# Supplementary material for: Prioritizing genomic variants through neuro-symbolic, knowledge-enhanced learning
Source: PubMed Central journal article supplement (PMC11132820; doi:10.1093/bioinformatics/btae301), 2024-05-02
Supplement: btae301_supplementary_data.pdf [file btae301_supplementary_data.pdf]

# Prioritizing genomic variants through neuro-symbolic, knowledge-enhanced learning (Supplementary materials)

Azza Althagafi, Robert Hoehndorf

## 1 Hyperparameter

This supplementary material presents the results of different embedding methods across various categories. We have classified them into three groups: graph-based methods, translation embedding methods, and semantic methods. For each category, we have evaluated different sets of parameters as follows:

- **Graph-based methods:**

- vector\_size: [50, 100, 200]
- window: [5, 10, 20]
- epochs: [10,20, 30, 50, 100]
- num\_walks: [10, 30, 50, 80]
- walk\_length: [5, 10, 20, 30]

- **Translation-based methods:**

- vector\_size: [50, 100, 150, 200]
- epochs: [20, 50, 100, 150, 200]
- learning\_rate: [0.0001, 0.001, 0.01, 0.1]
- batch\_size: [2048, 4096, 8192]

- **Semantic-based methods:**

- vector\_size: [50, 100, 150]
- margin: [0.1, 0.2,0.01]
- neg\_norm: [1,0.5]
- epochs: [20, 100, 1000]
- learning\_rate: [0.0001, 0.001, 0.01]
- batch\_size: [2048, 4096, 8192]

Selected Parameters:

---

**Algorithm 1** Incorporating New Patient Information and Updating Embeddings

---

- 1: **Input:** Description Logic theory  $D$  with signature  $\Sigma = (\mathbf{C}, \mathbf{R}, \mathbf{I})$  in ontology OWL format, Trained Embeddings  $E_{\text{trained}}$  for  $\mathbf{C}$  and  $\mathbf{R}$ , New Patient Information  $P = \{patient_i \sqsubseteq \exists has\_phenotype.phenotype_j \mid \text{for } i \in [1, n] \text{ for } j \in [1, m]\}$  as DL axioms
  - 2: **Output:** Updated Knowledge Graph  $G' = (V', E')$ , Updated Embeddings  $E_{\text{updated}}$
  - 3: **procedure** INCORPORATEANDUPDATE( $D, E_{\text{trained}}, P$ )
  - 4:     Generate  $D'$  with signature  $\Sigma' = (\mathbf{C}', \mathbf{R}', \mathbf{I})$  by adding axioms  $P$  to  $D$
  - 5:     Generate new graph  $G$  from  $D'$
  - 6:      $new\_nodes \leftarrow \mathbf{C}' / \mathbf{C}$
  - 7:      $corpus \leftarrow$  Random walks on the updated knowledge graph  $G' = (V', E')$  start from nodes in  $new\_nodes$
  - 8:     Initialize Word2Vec model with  $E_{\text{trained}}$  embeddings and add random embeddings for entities in  $new\_nodes$
  - 9:     Train Word2Vec embeddings on  $corpus$
  - 10:      $E_{\text{updated}} \leftarrow$  Updated embeddings from training on  $G'$
  - 11:     **return**  $G' = (V', E')$ ,  $E_{\text{updated}}$
  - 12: **end procedure**
- 

## 2 Variant predictions results across several models

We have conducted evaluations on various benchmark datasets, including synthetic datasets using clinical phenotypes and OMIM phenotypes, using the **transductive approach**. The evaluation assesses the performance of different embedding methods on these different datasets. The following tables and figures present a comparison of their performance with other state-of-the-art methods.

### 2.1 Transductive approach

#### 2.1.1 PAVS dataset

Table 1, Figure 1, or Figure 2, for the exonic variants and other types in Table 2

|                                  |           | Using the Clinical Phenotypes |                     |                      |                      | Using OMIM Phenotypes |                      |                      |                      |
|----------------------------------|-----------|-------------------------------|---------------------|----------------------|----------------------|-----------------------|----------------------|----------------------|----------------------|
|                                  |           | H@1                           | H@10                | H@30                 | H@50                 | H@1                   | H@10                 | H@30                 | H@50                 |
| Genotype-based prediction tools  | CADD      | 116 (0.0759)                  | 266 (0.1741)        | 467 (0.3056)         | 591 (0.3868)         | 116 (0.0759)          | 266 (0.1741)         | 467 (0.3056)         | 591 (0.3868)         |
|                                  | MCAP      | 4 (0.0026)                    | 261 (0.1708)        | 442 (0.2893)         | 511 (0.3344)         | 4 (0.0026)            | 261 (0.1708)         | 442 (0.2893)         | 511 (0.3344)         |
|                                  | SIFT      | 201 (0.1315)                  | 201 (0.1315)        | 201 (0.1315)         | 201 (0.1315)         | 201 (0.1315)          | 201 (0.1315)         | 201 (0.1315)         | 201 (0.1315)         |
|                                  | PolyPhen2 | 127 (0.0831)                  | 127 (0.0831)        | 127 (0.0831)         | 226 (0.1479)         | 127 (0.0831)          | 127 (0.0831)         | 127 (0.0831)         | 226 (0.1479)         |
|                                  | DANN      | 21 (0.0137)                   | 263 (0.1721)        | 263 (0.1721)         | 263 (0.1721)         | 21 (0.0137)           | 263 (0.1721)         | 263 (0.1721)         | 263 (0.1721)         |
|                                  | MetaSVM   | 20 (0.0131)                   | 111 (0.0726)        | 318 (0.2081)         | 406 (0.2657)         | 20 (0.0131)           | 111 (0.0726)         | 318 (0.2081)         | 406 (0.2657)         |
| Phenotype-based prediction tools | PHIVE     | 181 (0.1185)                  | 325 (0.2127)        | 364 (0.2382)         | 380 (0.2487)         | 346 (0.2264)          | 496 (0.3246)         | 518 (0.3390)         | 523 (0.3423)         |
|                                  | DeepPVP   | 221 (0.1446)                  | 661 (0.4326)        | 762 (0.4987)         | 795 (0.5203)         | 449 (0.2938)          | 858 (0.5615)         | 905 (0.5923)         | 924 (0.6047)         |
|                                  | Phenix    | 472 (0.3089)                  | 628 (0.4110)        | 746 (0.4882)         | 788 (0.5157)         | <b>1104 (0.7225)</b>  | 1130 (0.7395)        | 1153 (0.7546)        | 1159 (0.7585)        |
|                                  | hiPHIVE   | 431 (0.2821)                  | 653 (0.4274)        | 768 (0.5026)         | 809 (0.5295)         | 868 (0.5681)          | 1025 (0.6708)        | 1149 (0.7520)        | 1184 (0.7749)        |
| EmbedPVP (ConvE)                 | GO        | 195 (0.1276)                  | 366 (0.2395)        | 523 (0.3423)         | 659 (0.4313)         | 162 (0.1060)          | 389 (0.2546)         | 567 (0.3711)         | 682 (0.4463)         |
|                                  | HP        | 192 (0.1257)                  | 389 (0.2546)        | 558 (0.3652)         | 709 (0.4640)         | 201 (0.1315)          | 388 (0.2539)         | 535 (0.3501)         | 678 (0.4437)         |
|                                  | MP        | 154 (0.1008)                  | 385 (0.2520)        | 514 (0.3364)         | 601 (0.3933)         | 97 (0.0635)           | 232 (0.1518)         | 381 (0.2493)         | 453 (0.2965)         |
|                                  | UBERON    | 183 (0.1198)                  | 351 (0.2297)        | 521 (0.3410)         | 666 (0.4359)         | 35 (0.0229)           | 80 (0.0524)          | 139 (0.0910)         | 173 (0.1132)         |
|                                  | Union     | 159 (0.1041)                  | 315 (0.2062)        | 494 (0.3233)         | 631 (0.4130)         | 71 (0.0465)           | 158 (0.1034)         | 270 (0.1767)         | 364 (0.2382)         |
| EmbedPVP (DistMult)              | GO        | 322 (0.2107)                  | 564 (0.3691)        | 761 (0.4980)         | 849 (0.5556)         | 305 (0.1996)          | 608 (0.3979)         | 817 (0.5347)         | 884 (0.5785)         |
|                                  | HP        | 397 (0.2598)                  | 808 (0.5288)        | 918 (0.6008)         | 968 (0.6335)         | 552 (0.3613)          | 976 (0.6387)         | 1029 (0.6734)        | 1058 (0.6924)        |
|                                  | MP        | 364 (0.2382)                  | 645 (0.4221)        | 841 (0.5504)         | 938 (0.6139)         | 347 (0.2271)          | 595 (0.3894)         | 821 (0.5373)         | 914 (0.5982)         |
|                                  | UBERON    | 148 (0.0969)                  | 361 (0.2363)        | 570 (0.3730)         | 680 (0.4450)         | 157 (0.1027)          | 373 (0.2441)         | 551 (0.3606)         | 670 (0.4385)         |
|                                  | Union     | 352 (0.2304)                  | 729 (0.4771)        | 915 (0.5988)         | 990 (0.6479)         | 418 (0.2736)          | 840 (0.5497)         | 985 (0.6446)         | 1021 (0.6682)        |
| EmbedPVP (ELEmbedding)           | GO        | 183 (0.1198)                  | 340 (0.2225)        | 540 (0.3534)         | 688 (0.4503)         | 196 (0.1283)          | 341 (0.2232)         | 540 (0.3534)         | 680 (0.4450)         |
|                                  | HP        | 203 (0.1329)                  | 458 (0.2997)        | 649 (0.4247)         | 790 (0.5170)         | 179 (0.1171)          | 432 (0.2827)         | 639 (0.4182)         | 745 (0.4876)         |
|                                  | MP        | 184 (0.1204)                  | 404 (0.2644)        | 549 (0.3593)         | 727 (0.4758)         | 180 (0.1178)          | 426 (0.2788)         | 536 (0.3508)         | 728 (0.4764)         |
|                                  | UBERON    | 179 (0.1171)                  | 342 (0.2238)        | 534 (0.3495)         | 678 (0.4437)         | 182 (0.1191)          | 344 (0.2251)         | 534 (0.3495)         | 679 (0.4444)         |
|                                  | Union     | 176 (0.1152)                  | 369 (0.2415)        | 533 (0.3488)         | 675 (0.4418)         | 170 (0.1113)          | 353 (0.2310)         | 535 (0.3501)         | 692 (0.4529)         |
| EmbedPVP (Elboxembeddings)       | GO        | 183 (0.1198)                  | 354 (0.2317)        | 536 (0.3508)         | 698 (0.4568)         | 186 (0.1217)          | 341 (0.2232)         | 540 (0.3534)         | 697 (0.4562)         |
|                                  | HP        | 175 (0.1145)                  | 420 (0.2749)        | 653 (0.4274)         | 753 (0.4928)         | 181 (0.1185)          | 441 (0.2886)         | 632 (0.4136)         | 770 (0.5039)         |
|                                  | MP        | 175 (0.1145)                  | 440 (0.2880)        | 547 (0.3580)         | 702 (0.4594)         | 181 (0.1185)          | 431 (0.2821)         | 549 (0.3593)         | 725 (0.4745)         |
|                                  | UBERON    | 184 (0.1204)                  | 343 (0.2245)        | 534 (0.3495)         | 687 (0.4496)         | 182 (0.1191)          | 339 (0.2219)         | 531 (0.3475)         | 693 (0.4535)         |
|                                  | Union     | 167 (0.1093)                  | 332 (0.2173)        | 536 (0.3508)         | 677 (0.4431)         | 171 (0.1119)          | 365 (0.2389)         | 527 (0.3449)         | 676 (0.4424)         |
| EmbedPVP (TransD)                | GO        | 307 (0.2009)                  | 563 (0.3685)        | 726 (0.4751)         | 829 (0.5425)         | 670 (0.4385)          | 894 (0.5851)         | 1006 (0.6584)        | 1042 (0.6819)        |
|                                  | HP        | <b>482 (0.3154)</b>           | <b>846 (0.5537)</b> | <b>1007 (0.6590)</b> | <b>1056 (0.6911)</b> | 996 (0.6518)          | <u>1230 (0.8050)</u> | <u>1352 (0.8848)</u> | <b>1391 (0.9103)</b> |
|                                  | MP        | 396 (0.2592)                  | 675 (0.4418)        | 868 (0.5681)         | 947 (0.6198)         | 779 (0.5098)          | 922 (0.6034)         | 1031 (0.6747)        | 1072 (0.7016)        |
|                                  | UBERON    | 287 (0.1878)                  | 509 (0.3331)        | 674 (0.4411)         | 800 (0.5236)         | 699 (0.4575)          | 892 (0.5838)         | 995 (0.6512)         | 1023 (0.6695)        |
|                                  | Union     | 409 (0.2677)                  | 639 (0.4182)        | 833 (0.5452)         | 928 (0.6073)         | 899 (0.5884)          | 1086 (0.7107)        | 1158 (0.7579)        | 1245 (0.8148)        |
| EmbedPVP (TransE)                | GO        | 201 (0.1315)                  | 384 (0.2513)        | 535 (0.3501)         | 678 (0.4437)         | 206 (0.1348)          | 385 (0.2520)         | 535 (0.3501)         | 678 (0.4437)         |
|                                  | HP        | 218 (0.1427)                  | 415 (0.2716)        | 589 (0.3855)         | 710 (0.4647)         | 362 (0.2369)          | 597 (0.3907)         | 818 (0.5353)         | 911 (0.5962)         |
|                                  | MP        | 205 (0.1342)                  | 375 (0.2454)        | 535 (0.3501)         | 678 (0.4437)         | 205 (0.1342)          | 387 (0.2533)         | 535 (0.3501)         | 678 (0.4437)         |
|                                  | UBERON    | 198 (0.1296)                  | 377 (0.2467)        | 533 (0.3488)         | 676 (0.4424)         | 206 (0.1348)          | 374 (0.2448)         | 533 (0.3488)         | 677 (0.4431)         |
|                                  | Union     | 202 (0.1322)                  | 383 (0.2507)        | 535 (0.3501)         | 680 (0.4450)         | 205 (0.1342)          | 387 (0.2533)         | 539 (0.3527)         | 682 (0.4463)         |
| EmbedPVP (TransR)                | GO        | 170 (0.1113)                  | 348 (0.2277)        | 525 (0.3436)         | 663 (0.4339)         | 162 (0.1060)          | 360 (0.2356)         | 551 (0.3606)         | 682 (0.4463)         |
|                                  | HP        | 228 (0.1492)                  | 433 (0.2834)        | 611 (0.3999)         | 755 (0.4941)         | 353 (0.2310)          | 595 (0.3894)         | 801 (0.5242)         | 897 (0.5870)         |
|                                  | MP        | 184 (0.1204)                  | 358 (0.2343)        | 540 (0.3534)         | 672 (0.4398)         | 188 (0.1230)          | 385 (0.2520)         | 577 (0.3776)         | 706 (0.4620)         |
|                                  | UBERON    | 178 (0.1165)                  | 342 (0.2238)        | 540 (0.3534)         | 684 (0.4476)         | 185 (0.1211)          | 354 (0.2317)         | 547 (0.3580)         | 693 (0.4535)         |
|                                  | Union     | 197 (0.1289)                  | 370 (0.2421)        | 550 (0.3599)         | 703 (0.4601)         | 234 (0.1531)          | 414 (0.2709)         | 640 (0.4188)         | 790 (0.5170)         |
| EmbedPVP (DL2vec)                | GO        | 152 (0.0995)                  | 382 (0.2500)        | 554 (0.3626)         | 614 (0.4018)         | 491 (0.3213)          | 804 (0.5262)         | 944 (0.6178)         | 1010 (0.6610)        |
|                                  | HP        | 362 (0.2369)                  | 666 (0.4359)        | 787 (0.5151)         | 826 (0.5406)         | 1011 (0.6616)         | 1300 (0.8508)        | 1366 (0.8940)        | 1384 (0.9058)        |
|                                  | MP        | 255 (0.1669)                  | 491 (0.3213)        | 639 (0.4182)         | 701 (0.4588)         | 639 (0.4182)          | 914 (0.5982)         | 1043 (0.6826)        | 1106 (0.7238)        |
|                                  | UBERON    | 174 (0.1139)                  | 390 (0.2552)        | 498 (0.3259)         | 556 (0.3639)         | 539 (0.3527)          | 801 (0.5242)         | 904 (0.5916)         | 940 (0.6152)         |
|                                  | Union     | 358 (0.2343)                  | 636 (0.4162)        | 771 (0.5046)         | 824 (0.5393)         | 950 (0.6217)          | 1216 (0.7958)        | 1310 (0.8573)        | 1353 (0.8855)        |
| EmbedPVP (OWL2vec*)              | GO        | 188 (0.1230)                  | 385 (0.2520)        | 525 (0.3436)         | 592 (0.3874)         | 557 (0.3645)          | 876 (0.5733)         | 1011 (0.6616)        | 1059 (0.6931)        |
|                                  | HP        | 409 (0.2677)                  | 685 (0.4483)        | 783 (0.5124)         | 842 (0.5510)         | <u>1026 (0.6715)</u>  | <b>1313 (0.8593)</b> | <b>1373 (0.8986)</b> | <b>1391 (0.9103)</b> |
|                                  | MP        | 222 (0.1453)                  | 470 (0.3076)        | 618 (0.4045)         | 677 (0.4431)         | 665 (0.4352)          | 965 (0.6315)         | 1068 (0.6990)        | 1116 (0.7304)        |
|                                  | UBERON    | 158 (0.1034)                  | 379 (0.2480)        | 474 (0.3102)         | 525 (0.3436)         | 577 (0.3776)          | 800 (0.5236)         | 888 (0.5812)         | 937 (0.6132)         |
|                                  | Union     | 375 (0.2454)                  | 650 (0.4254)        | 787 (0.5151)         | 835 (0.5465)         | 959 (0.6276)          | 1253 (0.8200)        | 1325 (0.8671)        | 1368 (0.8953)        |

Table 1: EmbedPVP variant prediction results across several models and neuro-symbolic knowledge embeddings methods

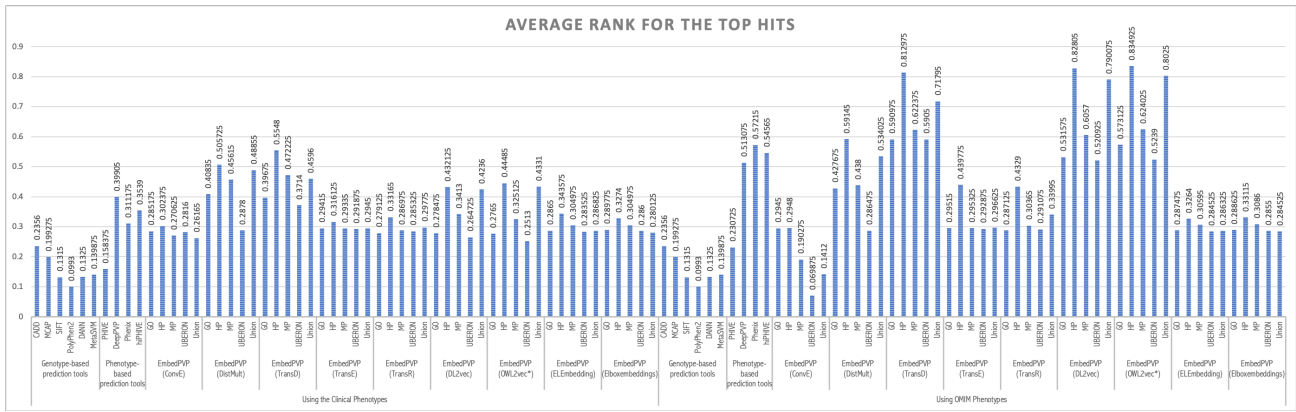

Figure 1: Average ranks for recall at 1, 10, 30, and 50 using synthetic datasets with clinical phenotypes and OMIM phenotypes (PAVS datasets)

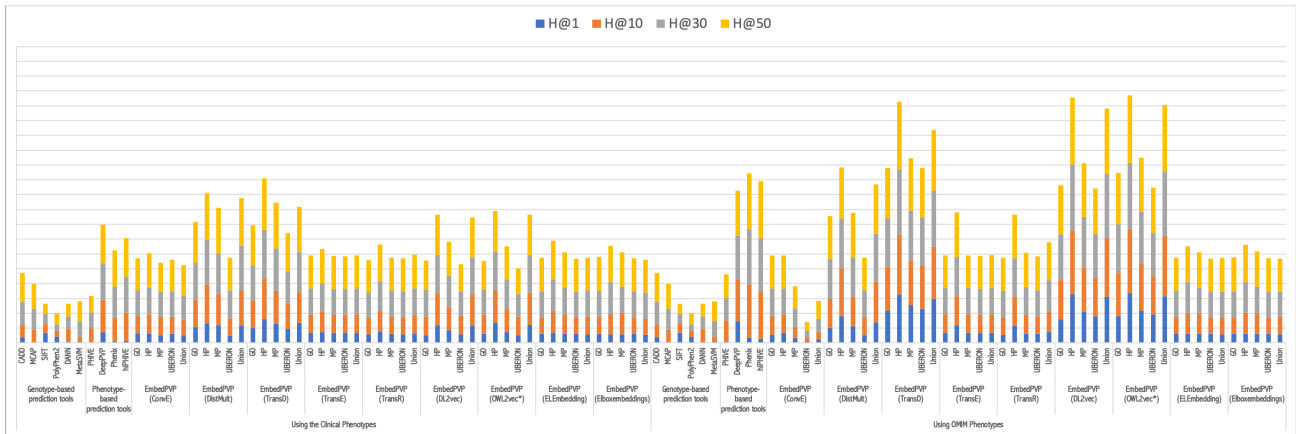

Figure 2: Recall at 1, 10, 30, and 50 using synthetic datasets with clinical phenotypes and OMIM phenotypes (PAVS dataset)

|                                  |             | Exonic              |                     |                     |                     | Non-Exonic         |                     |                     |                     |
|----------------------------------|-------------|---------------------|---------------------|---------------------|---------------------|--------------------|---------------------|---------------------|---------------------|
|                                  |             | H@1                 | H@10                | H@30                | H@50                | H@1                | H@10                | H@30                | H@50                |
| Genotype-based prediction tools  | CADD        | 116 (0.0995)        | 205 (0.1758)        | 397 (0.3405)        | 521 (0.4468)        | 8 (0.0270)         | 78 (0.2635)         | 99 (0.3345)         | 107 (0.3615)        |
|                                  | MCAP        | 4 (0.0034)          | 261 (0.2238)        | 442 (0.3791)        | 511 (0.4383)        | 0 (0.0)            | 42 (0.1419)         | 67 (0.2264)         | 74 (0.25)           |
|                                  | SIFT        | 201 (0.1724)        | 201 (0.1724)        | 201 (0.1724)        | 201 (0.1724)        | 12 (0.0405)        | 12 (0.0405)         | 12 (0.0405)         | 12 (0.0405)         |
|                                  | PolyPhen2   | 127 (0.1089)        | 127 (0.1089)        | 127 (0.1089)        | 226 (0.1938)        | 20 (0.0676)        | 20 (0.0676)         | 20 (0.0676)         | 63 (0.2128)         |
|                                  | DANN        | 21 (0.0180)         | 263 (0.2256)        | 263 (0.2256)        | 263 (0.2256)        | 0 (0.0)            | 17 (0.0574)         | 17 (0.0574)         | 17 (0.0574)         |
| MetaSVM                          | 20 (0.0172) | 111 (0.0952)        | 318 (0.2727)        | 406 (0.3482)        | 3 (0.0101)          | 28 (0.0946)        | 41 (0.1385)         | 47 (0.1588)         |                     |
| Phenotype-based prediction tools | PHIVE       | 169 (0.1449)        | 304 (0.2607)        | 331 (0.2839)        | 347 (0.2976)        | 32 (0.1081)        | 46 (0.1554)         | 49 (0.1655)         | 49 (0.1655)         |
|                                  | DeepPVP     | 201 (0.1724)        | 600 (0.5146)        | 689 (0.5909)        | 720 (0.6175)        | 9 (0.0304)         | 34 (0.1149)         | 43 (0.1453)         | 44 (0.1486)         |
|                                  | Phenix      | 419 (0.3593)        | 564 (0.4837)        | 675 (0.5789)        | 709 (0.6081)        | 79 (0.2669)        | <b>117 (0.3953)</b> | <b>160 (0.5405)</b> | <b>175 (0.5912)</b> |
|                                  | hiPHIVE     | 383 (0.3285)        | 581 (0.4983)        | 674 (0.5780)        | 709 (0.6081)        | <b>80 (0.2703)</b> | 110 (0.3716)        | 147 (0.4966)        | 154 (0.5203)        |
| EmbedPVP (ConvE)                 | GO          | 194 (0.1664)        | 317 (0.2719)        | 455 (0.3902)        | 590 (0.5060)        | 4 (0.0135)         | 55 (0.1858)         | 74 (0.25)           | 75 (0.2534)         |
|                                  | HP          | 192 (0.1647)        | 328 (0.2813)        | 488 (0.4185)        | 639 (0.5480)        | 1 (0.0034)         | 67 (0.2264)         | 76 (0.2568)         | 76 (0.2568)         |
|                                  | MP          | 147 (0.1261)        | 347 (0.2976)        | 463 (0.3971)        | 545 (0.4674)        | 8 (0.0270)         | 41 (0.1385)         | 55 (0.1858)         | 60 (0.2027)         |
|                                  | UBERON      | 183 (0.1569)        | 303 (0.2599)        | 452 (0.3877)        | 597 (0.5120)        | 1 (0.0034)         | 53 (0.1791)         | 75 (0.2534)         | 75 (0.2534)         |
|                                  | Union       | 159 (0.1364)        | 286 (0.2453)        | 431 (0.3696)        | 568 (0.4871)        | 1 (0.0034)         | 35 (0.1182)         | 69 (0.2331)         | 70 (0.2365)         |
| EmbedPVP (DistMult)              | GO          | 289 (0.2479)        | 505 (0.4331)        | 691 (0.5926)        | 774 (0.6638)        | 36 (0.1216)        | 64 (0.2162)         | 78 (0.2635)         | 83 (0.2804)         |
|                                  | HP          | 365 (0.3130)        | 734 (0.6295)        | 834 (0.7153)        | 881 (0.7556)        | 37 (0.1250)        | 85 (0.2872)         | 101 (0.3412)        | 109 (0.3682)        |
|                                  | MP          | 333 (0.2856)        | 587 (0.5034)        | 772 (0.6621)        | 862 (0.7393)        | 35 (0.1182)        | 64 (0.2162)         | 80 (0.2703)         | 87 (0.2939)         |
|                                  | UBERON      | 140 (0.1201)        | 312 (0.2676)        | 507 (0.4348)        | 615 (0.5274)        | 10 (0.0338)        | 53 (0.1791)         | 68 (0.2297)         | 73 (0.2466)         |
|                                  | Union       | 330 (0.2830)        | 664 (0.5695)        | 838 (0.7187)        | 904 (0.7753)        | 27 (0.0912)        | 70 (0.2365)         | 87 (0.2939)         | 96 (0.3243)         |
| EmbedPVP (ELEmbedding)           | GO          | 183 (0.1569)        | 305 (0.2616)        | 470 (0.4031)        | 618 (0.53)          | 1 (0.0034)         | 40 (0.1351)         | 76 (0.2568)         | 76 (0.2568)         |
|                                  | HP          | 203 (0.1741)        | 391 (0.3353)        | 579 (0.4966)        | 719 (0.6166)        | 1 (0.0034)         | 73 (0.2466)         | 76 (0.2568)         | 80 (0.2703)         |
|                                  | MP          | 184 (0.1578)        | 339 (0.2907)        | 479 (0.4108)        | 657 (0.5635)        | 1 (0.0034)         | 71 (0.2399)         | 76 (0.2568)         | 76 (0.2568)         |
|                                  | UBERON      | 179 (0.1535)        | 300 (0.2573)        | 464 (0.3979)        | 608 (0.5214)        | 1 (0.0034)         | 47 (0.1588)         | 76 (0.2568)         | 76 (0.2568)         |
|                                  | Union       | 176 (0.1509)        | 321 (0.2753)        | 463 (0.3971)        | 605 (0.5189)        | 1 (0.0034)         | 53 (0.1791)         | 76 (0.2568)         | 76 (0.2568)         |
| EmbedPVP (Elboxembeddings)       | GO          | 183 (0.1569)        | 311 (0.2667)        | 466 (0.3997)        | 628 (0.5386)        | 1 (0.0034)         | 48 (0.1622)         | 76 (0.2568)         | 76 (0.2568)         |
|                                  | HP          | 175 (0.1501)        | 357 (0.3062)        | 583 (0.5)           | 683 (0.5858)        | 1 (0.0034)         | 69 (0.2331)         | 76 (0.2568)         | 78 (0.2635)         |
|                                  | MP          | 175 (0.1501)        | 375 (0.3216)        | 477 (0.4091)        | 632 (0.5420)        | 1 (0.0034)         | 71 (0.2399)         | 76 (0.2568)         | 76 (0.2568)         |
|                                  | UBERON      | 184 (0.1578)        | 293 (0.2513)        | 464 (0.3979)        | 617 (0.5292)        | 1 (0.0034)         | 56 (0.1892)         | 76 (0.2568)         | 76 (0.2568)         |
|                                  | Union       | 167 (0.1432)        | 299 (0.2564)        | 466 (0.3997)        | 607 (0.5206)        | 1 (0.0034)         | 38 (0.1284)         | 76 (0.2568)         | 76 (0.2568)         |
| EmbedPVP (TransD)                | GO          | 293 (0.2513)        | 501 (0.4297)        | 652 (0.5592)        | 751 (0.6441)        | 19 (0.0642)        | 68 (0.2297)         | 83 (0.2804)         | 88 (0.2973)         |
|                                  | HP          | <b>444 (0.3808)</b> | <b>759 (0.6509)</b> | <b>893 (0.7659)</b> | <b>930 (0.7976)</b> | 49 (0.1655)        | <u>103 (0.3480)</u> | <u>120 (0.4054)</u> | <u>124 (0.4189)</u> |
|                                  | MP          | 372 (0.3190)        | 618 (0.5300)        | 789 (0.6767)        | 861 (0.7384)        | 30 (0.1014)        | 65 (0.2196)         | 91 (0.3074)         | 98 (0.3311)         |
|                                  | UBERON      | 266 (0.2281)        | 455 (0.3902)        | 598 (0.5129)        | 720 (0.6175)        | 25 (0.0845)        | 64 (0.2162)         | 90 (0.3041)         | 98 (0.3311)         |
|                                  | Union       | 376 (0.3225)        | 575 (0.4931)        | 753 (0.6458)        | 835 (0.7161)        | 40 (0.1351)        | 79 (0.2669)         | 103 (0.3480)        | 106 (0.3581)        |
| EmbedPVP (TransE)                | GO          | 201 (0.1724)        | 326 (0.2796)        | 465 (0.3988)        | 608 (0.5214)        | 1 (0.0034)         | 63 (0.2128)         | 76 (0.2568)         | 76 (0.2568)         |
|                                  | HP          | 214 (0.1835)        | 354 (0.3036)        | 518 (0.4443)        | 639 (0.5480)        | 6 (0.0203)         | 67 (0.2264)         | 78 (0.2635)         | 78 (0.2635)         |
|                                  | MP          | 205 (0.1758)        | 323 (0.2770)        | 465 (0.3988)        | 608 (0.5214)        | 1 (0.0034)         | 58 (0.1959)         | 76 (0.2568)         | 76 (0.2568)         |
|                                  | UBERON      | 198 (0.1698)        | 323 (0.2770)        | 463 (0.3971)        | 606 (0.5197)        | 1 (0.0034)         | 59 (0.1993)         | 76 (0.2568)         | 76 (0.2568)         |
|                                  | Union       | 202 (0.1732)        | 323 (0.2770)        | 465 (0.3988)        | 610 (0.5232)        | 1 (0.0034)         | 66 (0.2230)         | 76 (0.2568)         | 76 (0.2568)         |
| EmbedPVP (TransR)                | GO          | 170 (0.1458)        | 308 (0.2642)        | 455 (0.3902)        | 593 (0.5086)        | 1 (0.0034)         | 45 (0.1520)         | 76 (0.2568)         | 76 (0.2568)         |
|                                  | HP          | 224 (0.1921)        | 369 (0.3165)        | 541 (0.4640)        | 683 (0.5858)        | 8 (0.0270)         | 70 (0.2365)         | 76 (0.2568)         | 79 (0.2669)         |
|                                  | MP          | 183 (0.1569)        | 315 (0.2702)        | 470 (0.4031)        | 602 (0.5163)        | 2 (0.0068)         | 49 (0.1655)         | 76 (0.2568)         | 76 (0.2568)         |
|                                  | UBERON      | 178 (0.1527)        | 304 (0.2607)        | 470 (0.4031)        | 614 (0.5266)        | 1 (0.0034)         | 43 (0.1453)         | 76 (0.2568)         | 76 (0.2568)         |
|                                  | Union       | 196 (0.1681)        | 317 (0.2719)        | 480 (0.4117)        | 633 (0.5429)        | 2 (0.0068)         | 59 (0.1993)         | 76 (0.2568)         | 76 (0.2568)         |
| EmbedPVP (DL2vec)                | GO          | 137 (0.1175)        | 345 (0.2959)        | 499 (0.4280)        | 553 (0.4743)        | 18 (0.0608)        | 48 (0.1622)         | 64 (0.2162)         | 68 (0.2297)         |
|                                  | HP          | 333 (0.2856)        | 571 (0.4897)        | 676 (0.5798)        | 707 (0.6063)        | 40 (0.1351)        | 87 (0.2939)         | 96 (0.3243)         | 101 (0.3412)        |
|                                  | MP          | 234 (0.2007)        | 443 (0.3799)        | 572 (0.4906)        | 628 (0.5386)        | 26 (0.0878)        | 58 (0.1959)         | 92 (0.3108)         | 101 (0.3412)        |
|                                  | UBERON      | 161 (0.1381)        | 349 (0.2993)        | 439 (0.3765)        | 490 (0.4202)        | 19 (0.0642)        | 50 (0.1689)         | 63 (0.2128)         | 66 (0.2230)         |
|                                  | Union       | 325 (0.2787)        | 557 (0.4777)        | 671 (0.5755)        | 714 (0.6123)        | 42 (0.1419)        | 79 (0.2669)         | 94 (0.3176)         | 104 (0.3514)        |
| EmbedPVP (OWL2vec*)              | GO          | 171 (0.1467)        | 357 (0.3062)        | 476 (0.4082)        | 535 (0.4588)        | 23 (0.0777)        | 39 (0.1318)         | 56 (0.1892)         | 65 (0.2196)         |
|                                  | HP          | 375 (0.3216)        | 587 (0.5034)        | 673 (0.5772)        | 721 (0.6184)        | <u>50 (0.1689)</u> | 88 (0.2973)         | 101 (0.3412)        | 107 (0.3615)        |
|                                  | MP          | 206 (0.1767)        | 419 (0.3593)        | 549 (0.4708)        | 600 (0.5146)        | 22 (0.0743)        | 54 (0.1824)         | 75 (0.2534)         | 93 (0.3142)         |
|                                  | UBERON      | 147 (0.1261)        | 348 (0.2985)        | 434 (0.3722)        | 478 (0.4099)        | 16 (0.0541)        | 40 (0.1351)         | 50 (0.1689)         | 54 (0.1824)         |
|                                  | Union       | 346 (0.2967)        | 579 (0.4966)        | 683 (0.5858)        | 728 (0.6244)        | 41 (0.1385)        | 72 (0.2432)         | 88 (0.2973)         | 89 (0.3007)         |

Table 2: EmbedPVP variant prediction results across several models for the exonic and non-exonic variants

## 2.1.2 Phenopackets dataset

Table 3, Figure 3

|                                  |              | Using the Clinical Phenotypes |                     |                     |                     | Using OMIM Phenotypes |                     |                     |                     |
|----------------------------------|--------------|-------------------------------|---------------------|---------------------|---------------------|-----------------------|---------------------|---------------------|---------------------|
|                                  |              | H@1                           | H@10                | H@30                | H@50                | H@1                   | H@10                | H@30                | H@50                |
| Genotype-based prediction tools  | CADD         | 51 (0.1328)                   | 104 (0.2708)        | 152 (0.3958)        | 184 (0.4792)        | 51 (0.1328)           | 104 (0.2708)        | 152 (0.3958)        | 184 (0.4792)        |
|                                  | MCAP         | 2 (0.0052)                    | 68 (0.1771)         | 105 (0.2734)        | 122 (0.3177)        | 2 (0.0052)            | 68 (0.1771)         | 105 (0.2734)        | 122 (0.3177)        |
|                                  | SIFT         | 69 (0.1797)                   | 69 (0.1797)         | 69 (0.1797)         | 69 (0.1797)         | 69 (0.1797)           | 69 (0.1797)         | 69 (0.1797)         | 69 (0.1797)         |
|                                  | PolyPhen2    | 51 (0.1328)                   | 51 (0.1328)         | 51 (0.1328)         | 71 (0.1849)         | 51 (0.1328)           | 51 (0.1328)         | 51 (0.1328)         | 71 (0.1849)         |
|                                  | DANN         | 4 (0.0104)                    | 81 (0.2109)         | 81 (0.2109)         | 81 (0.2109)         | 4 (0.0104)            | 81 (0.2109)         | 81 (0.2109)         | 81 (0.2109)         |
|                                  | MetaSVM      | 12 (0.0312)                   | 37 (0.0964)         | 80 (0.2083)         | 101 (0.2630)        | 12 (0.0312)           | 37 (0.0964)         | 80 (0.2083)         | 101 (0.2630)        |
| Phenotype-based prediction tools | PHIVE        | 48 (0.1250)                   | 80 (0.2083)         | 87 (0.2266)         | 87 (0.2266)         | 53 (0.1380)           | 94 (0.2448)         | 100 (0.2604)        | 100 (0.2604)        |
|                                  | DeepPVP      | 135 (0.3516)                  | 204 (0.5312)        | 220 (0.5729)        | 228 (0.5938)        | 193 (0.5026)          | 232 (0.6042)        | 233 (0.6068)        | 244 (0.6354)        |
|                                  | Phenix       | <b>202 (0.5260)</b>           | <b>250 (0.6510)</b> | <b>293 (0.7630)</b> | <b>308 (0.8021)</b> | <b>359 (0.9349)</b>   | <b>372 (0.9688)</b> | <b>378 (0.9844)</b> | <b>378 (0.9844)</b> |
| EmbedPVP (ConvE)                 | hiPHIVE      | 193 (0.5026)                  | 245 (0.6380)        | 264 (0.6875)        | 278 (0.7240)        | 285 (0.7422)          | 342 (0.8906)        | 371 (0.9661)        | 377 (0.9818)        |
|                                  | GO           | 6 (0.0156)                    | 18 (0.0469)         | 39 (0.1016)         | 47 (0.1224)         | 17 (0.0443)           | 50 (0.1302)         | 84 (0.2188)         | 105 (0.2734)        |
|                                  | HP           | 38 (0.0990)                   | 93 (0.2422)         | 141 (0.3672)        | 172 (0.4479)        | 40 (0.1042)           | 104 (0.2708)        | 153 (0.3984)        | 183 (0.4766)        |
|                                  | MP           | 17 (0.0443)                   | 62 (0.1615)         | 101 (0.2630)        | 122 (0.3177)        | 6 (0.0156)            | 34 (0.0885)         | 56 (0.1458)         | 68 (0.1771)         |
|                                  | UBERON       | 43 (0.1120)                   | 92 (0.2396)         | 139 (0.3620)        | 176 (0.4583)        | 46 (0.1198)           | 96 (0.25)           | 152 (0.3958)        | 185 (0.4818)        |
| EmbedPVP (DistMult)              | Union        | 46 (0.1198)                   | 96 (0.25)           | 148 (0.3854)        | 182 (0.4740)        | 16 (0.0417)           | 40 (0.1042)         | 80 (0.2083)         | 104 (0.2708)        |
|                                  | GO           | 60 (0.1562)                   | 150 (0.3906)        | 220 (0.5729)        | 242 (0.6302)        | 89 (0.2318)           | 145 (0.3776)        | 200 (0.5208)        | 221 (0.5755)        |
|                                  | HP           | 102 (0.2656)                  | 197 (0.5130)        | 218 (0.5677)        | 221 (0.5755)        | 112 (0.2917)          | 210 (0.5469)        | 223 (0.5807)        | 225 (0.5859)        |
|                                  | MP           | 76 (0.1979)                   | 147 (0.3828)        | 203 (0.5286)        | 229 (0.5964)        | 62 (0.1615)           | 142 (0.3698)        | 200 (0.5208)        | 236 (0.6146)        |
|                                  | UBERON       | 42 (0.1094)                   | 107 (0.2786)        | 151 (0.3932)        | 189 (0.4922)        | 41 (0.1068)           | 108 (0.2812)        | 167 (0.4349)        | 208 (0.5417)        |
| EmbedPVP (ELEmbedding)           | Union        | 38 (0.0990)                   | 152 (0.3958)        | 202 (0.5260)        | 216 (0.5625)        | 75 (0.1953)           | 158 (0.4115)        | 207 (0.5391)        | 219 (0.5703)        |
|                                  | GO           | 47 (0.1224)                   | 93 (0.2422)         | 155 (0.4036)        | 183 (0.4766)        | 46 (0.1198)           | 95 (0.2474)         | 154 (0.4010)        | 187 (0.4870)        |
|                                  | HP           | 43 (0.1120)                   | 119 (0.3099)        | 169 (0.4401)        | 198 (0.5156)        | 40 (0.1042)           | 109 (0.2839)        | 168 (0.4375)        | 192 (0.5000)        |
|                                  | MP           | 45 (0.1172)                   | 108 (0.2812)        | 154 (0.4010)        | 194 (0.5052)        | 46 (0.1198)           | 106 (0.2760)        | 153 (0.3984)        | 190 (0.4948)        |
|                                  | UBERON       | 47 (0.1224)                   | 92 (0.2396)         | 151 (0.3932)        | 186 (0.4844)        | 46 (0.1198)           | 88 (0.2292)         | 153 (0.3984)        | 186 (0.4844)        |
| EmbedPVP (Elboxembeddings)       | Union        | 46 (0.1198)                   | 93 (0.2422)         | 148 (0.3854)        | 183 (0.4766)        | 46 (0.1198)           | 94 (0.2448)         | 151 (0.3932)        | 181 (0.4714)        |
|                                  | GO           | 47 (0.1224)                   | 97 (0.2526)         | 151 (0.3932)        | 186 (0.4844)        | 47 (0.1224)           | 96 (0.25)           | 145 (0.3776)        | 181 (0.4714)        |
|                                  | HP           | 42 (0.1094)                   | 114 (0.2969)        | 168 (0.4375)        | 194 (0.5052)        | 40 (0.1042)           | 115 (0.2995)        | 172 (0.4479)        | 198 (0.5156)        |
|                                  | MP           | 46 (0.1198)                   | 105 (0.2734)        | 157 (0.4089)        | 189 (0.4922)        | 41 (0.1068)           | 112 (0.2917)        | 159 (0.4141)        | 187 (0.4870)        |
|                                  | UBERON       | 45 (0.1172)                   | 99 (0.2578)         | 150 (0.3906)        | 182 (0.4740)        | 46 (0.1198)           | 89 (0.2318)         | 153 (0.3984)        | 180 (0.4688)        |
| EmbedPVP (TransD)                | Union        | 46 (0.1198)                   | 94 (0.2448)         | 151 (0.3932)        | 184 (0.4792)        | 46 (0.1198)           | 99 (0.2578)         | 142 (0.3698)        | 179 (0.4661)        |
|                                  | GO           | 101 (0.2630)                  | 177 (0.4609)        | 228 (0.5938)        | 250 (0.6510)        | 140 (0.3646)          | 207 (0.5391)        | 237 (0.6172)        | 257 (0.6693)        |
|                                  | HP           | 160 (0.4167)                  | 217 (0.5651)        | 230 (0.5990)        | 240 (0.6250)        | 212 (0.5521)          | 244 (0.6354)        | 267 (0.6953)        | 272 (0.7083)        |
|                                  | MP           | 134 (0.3490)                  | 194 (0.5052)        | 235 (0.6120)        | 252 (0.6562)        | 175 (0.4557)          | 215 (0.5599)        | 233 (0.6068)        | 248 (0.6458)        |
|                                  | UBERON       | 120 (0.3125)                  | 202 (0.5260)        | 237 (0.6172)        | 253 (0.6589)        | 156 (0.4062)          | 220 (0.5729)        | 240 (0.6250)        | 258 (0.6719)        |
| EmbedPVP (TransE)                | Union        | 136 (0.3542)                  | 217 (0.5651)        | 247 (0.6432)        | 257 (0.6693)        | 199 (0.5182)          | 230 (0.5990)        | 256 (0.6667)        | 265 (0.6901)        |
|                                  | GO           | 49 (0.1276)                   | 102 (0.2656)        | 152 (0.3958)        | 184 (0.4792)        | 50 (0.1302)           | 101 (0.2630)        | 152 (0.3958)        | 184 (0.4792)        |
|                                  | HP           | 51 (0.1328)                   | 105 (0.2734)        | 160 (0.4167)        | 191 (0.4974)        | 97 (0.2526)           | 163 (0.4245)        | 220 (0.5729)        | 242 (0.6302)        |
|                                  | MP           | 51 (0.1328)                   | 102 (0.2656)        | 152 (0.3958)        | 184 (0.4792)        | 50 (0.1302)           | 101 (0.2630)        | 152 (0.3958)        | 184 (0.4792)        |
|                                  | UBERON       | 49 (0.1276)                   | 100 (0.2604)        | 152 (0.3958)        | 184 (0.4792)        | 50 (0.1302)           | 99 (0.2578)         | 152 (0.3958)        | 184 (0.4792)        |
| EmbedPVP (TransR)                | Union        | 50 (0.1302)                   | 99 (0.2578)         | 152 (0.3958)        | 184 (0.4792)        | 50 (0.1302)           | 101 (0.2630)        | 154 (0.4010)        | 185 (0.4818)        |
|                                  | GO           | 40 (0.1042)                   | 94 (0.2448)         | 146 (0.3802)        | 184 (0.4792)        | 34 (0.0885)           | 93 (0.2422)         | 145 (0.3776)        | 185 (0.4818)        |
|                                  | HP           | 57 (0.1484)                   | 121 (0.3151)        | 183 (0.4766)        | 210 (0.5469)        | 103 (0.2682)          | 165 (0.4297)        | 215 (0.5599)        | 237 (0.6172)        |
|                                  | MP           | 45 (0.1172)                   | 99 (0.2578)         | 152 (0.3958)        | 185 (0.4818)        | 47 (0.1224)           | 100 (0.2604)        | 158 (0.4115)        | 190 (0.4948)        |
|                                  | UBERON       | 45 (0.1172)                   | 95 (0.2474)         | 159 (0.4141)        | 184 (0.4792)        | 46 (0.1198)           | 98 (0.2552)         | 156 (0.4062)        | 190 (0.4948)        |
| EmbedPVP (DL2vec)                | Union        | 53 (0.1380)                   | 109 (0.2839)        | 161 (0.4193)        | 199 (0.5182)        | 60 (0.1562)           | 120 (0.3125)        | 178 (0.4635)        | 211 (0.5495)        |
|                                  | GO           | 71 (0.1849)                   | 142 (0.3698)        | 179 (0.4661)        | 198 (0.5156)        | 139 (0.3620)          | 204 (0.5312)        | 233 (0.6068)        | 241 (0.6276)        |
|                                  | HP           | 161 (0.4193)                  | 216 (0.5625)        | 233 (0.6068)        | 237 (0.6172)        | 233 (0.6068)          | 270 (0.7031)        | 274 (0.7135)        | 276 (0.7188)        |
|                                  | MP           | 86 (0.2240)                   | 160 (0.4167)        | 183 (0.4766)        | 200 (0.5208)        | 169 (0.4401)          | 207 (0.5391)        | 224 (0.5833)        | 246 (0.6406)        |
|                                  | UBERON       | 83 (0.2161)                   | 150 (0.3906)        | 178 (0.4635)        | 193 (0.5026)        | 163 (0.4245)          | 207 (0.5391)        | 223 (0.5807)        | 230 (0.5990)        |
| EmbedPVP (OWL2vec*)              | Union        | 122 (0.3177)                  | 193 (0.5026)        | 219 (0.5703)        | 235 (0.6120)        | 208 (0.5417)          | 252 (0.6562)        | 269 (0.7005)        | 275 (0.7161)        |
|                                  | GO           | 70 (0.1823)                   | 142 (0.3698)        | 181 (0.4714)        | 204 (0.5312)        | 150 (0.3906)          | 211 (0.5495)        | 234 (0.6094)        | 252 (0.6562)        |
|                                  | HP           | 156 (0.4062)                  | 213 (0.5547)        | 226 (0.5885)        | 236 (0.6146)        | 235 (0.6120)          | 270 (0.7031)        | 276 (0.7188)        | 277 (0.7214)        |
|                                  | MP           | 88 (0.2292)                   | 164 (0.4271)        | 190 (0.4948)        | 200 (0.5208)        | 165 (0.4297)          | 205 (0.5339)        | 220 (0.5729)        | 230 (0.5990)        |
|                                  | UBERON       | 75 (0.1953)                   | 144 (0.3750)        | 173 (0.4505)        | 187 (0.4870)        | 155 (0.4036)          | 202 (0.5260)        | 220 (0.5729)        | 231 (0.6016)        |
| Union                            | 119 (0.3099) | 197 (0.5130)                  | 211 (0.5495)        | 220 (0.5729)        | 220 (0.5729)        | 264 (0.6875)          | 281 (0.7318)        | 285 (0.7422)        |                     |

Table 3: EmbedPVP variant prediction results across several models using Phenopackets dataset

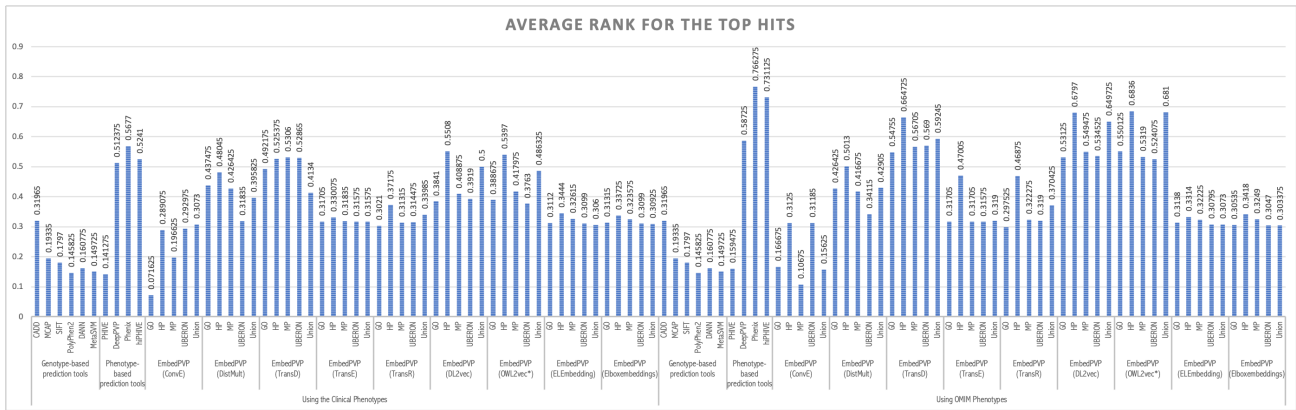

Figure 3: Average ranks for recall at 1, 10, 30, and 50 using synthetic datasets with clinical phenotypes and OMIM phenotypes (Phenopackets dataset)

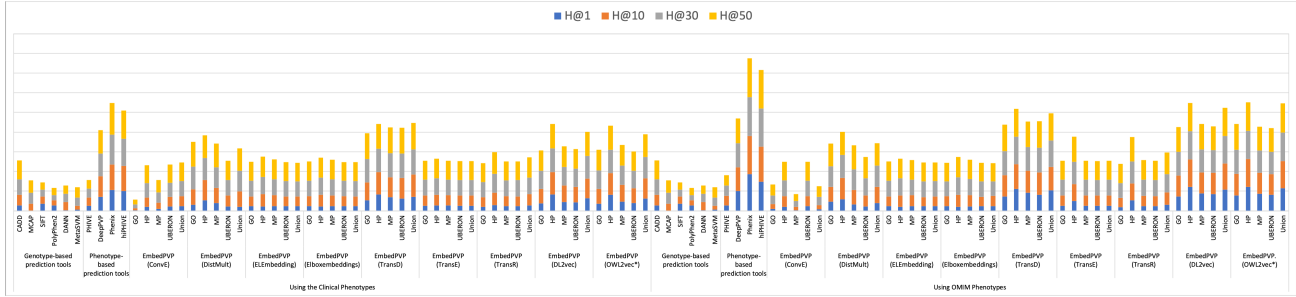

Figure 4: Recall at 1, 10, 30, and 50 using synthetic datasets with clinical phenotypes and OMIM phenotypes (Phenopackets dataset)

### 2.1.3 ClinVar time-split

The results are in Table 4. Tables 5 and 6 show the results of using novel and known genes or diseases. Table 7 provides the evaluation for exonic and non-exonic variants.

|                                  |           | H@1                 | H@10                | H@30                | H@50                |
|----------------------------------|-----------|---------------------|---------------------|---------------------|---------------------|
| Genotype-based prediction tools  | CADD      | 239 (0.2209)        | 505 (0.4667)        | 600 (0.5545)        | 688 (0.6359)        |
|                                  | MCAP      | 11 (0.0102)         | 125 (0.1155)        | 201 (0.1858)        | 244 (0.2255)        |
|                                  | SIFT      | 198 (0.1830)        | 198 (0.1830)        | 198 (0.1830)        | 198 (0.1830)        |
|                                  | PolyPhen2 | 112 (0.1035)        | 112 (0.1035)        | 112 (0.1035)        | 182 (0.1682)        |
|                                  | DANN      | 7 (0.0065)          | 172 (0.1590)        | 172 (0.1590)        | 172 (0.1590)        |
|                                  | MetaSVM   | 20 (0.0185)         | 74 (0.0684)         | 139 (0.1285)        | 177 (0.1636)        |
| Phenotype-based prediction tools | PHIVE     | 175 (0.1617)        | 284 (0.2625)        | 298 (0.2754)        | 301 (0.2782)        |
|                                  | deeppvp   | 396 (0.3660)        | 532 (0.4917)        | 560 (0.5176)        | 572 (0.5287)        |
|                                  | Phenix    | 118 (0.1091)        | 567 (0.5240)        | 620 (0.5730)        | 633 (0.5850)        |
|                                  | hiPHIVE   | 487 (0.4501)        | 586 (0.5416)        | 641 (0.5924)        | 662 (0.6118)        |
| EmbedPVP (ConvE)                 | GO        | 102 (0.0943)        | 272 (0.2514)        | 385 (0.3558)        | 435 (0.4020)        |
|                                  | HP        | 220 (0.2033)        | 501 (0.4630)        | 597 (0.5518)        | 686 (0.6340)        |
|                                  | MP        | 208 (0.1922)        | 460 (0.4251)        | 579 (0.5351)        | 662 (0.6118)        |
|                                  | UBERON    | 205 (0.1895)        | 504 (0.4658)        | 599 (0.5536)        | 688 (0.6359)        |
|                                  | Union     | 188 (0.1738)        | 401 (0.3706)        | 564 (0.5213)        | 662 (0.6118)        |
| EmbedPVP (DistMult)              | GO        | 314 (0.2902)        | 480 (0.4436)        | 628 (0.5804)        | 694 (0.6414)        |
|                                  | HP        | 345 (0.3189)        | 571 (0.5277)        | 611 (0.5647)        | 623 (0.5758)        |
|                                  | MP        | 350 (0.3235)        | 489 (0.4519)        | 663 (0.6128)        | 744 (0.6876)        |
|                                  | UBERON    | 214 (0.1978)        | 461 (0.4261)        | 608 (0.5619)        | 689 (0.6368)        |
|                                  | Union     | 246 (0.2274)        | 498 (0.4603)        | 616 (0.5693)        | 661 (0.6109)        |
| EmbedPVP (ELEmbedding)           | GO        | 215 (0.1987)        | 454 (0.4196)        | 600 (0.5545)        | 695 (0.6423)        |
|                                  | HP        | 189 (0.1747)        | 515 (0.4760)        | 616 (0.5693)        | 694 (0.6414)        |
|                                  | MP        | 209 (0.1932)        | 518 (0.4787)        | 597 (0.5518)        | 706 (0.6525)        |
|                                  | UBERON    | 205 (0.1895)        | 466 (0.4307)        | 598 (0.5527)        | 691 (0.6386)        |
|                                  | Union     | 206 (0.1904)        | 454 (0.4196)        | 595 (0.5499)        | 691 (0.6386)        |
| EmbedPVP (Elboxembeddings)       | GO        | 202 (0.1867)        | 464 (0.4288)        | 599 (0.5536)        | 693 (0.6405)        |
|                                  | HP        | 180 (0.1664)        | 505 (0.4667)        | 614 (0.5675)        | 687 (0.6349)        |
|                                  | MP        | 208 (0.1922)        | 500 (0.4621)        | 602 (0.5564)        | 703 (0.6497)        |
|                                  | UBERON    | 213 (0.1969)        | 442 (0.4085)        | 590 (0.5453)        | 685 (0.6331)        |
|                                  | Union     | 204 (0.1885)        | 440 (0.4067)        | 599 (0.5536)        | 684 (0.6322)        |
| EmbedPVP (TransD)                | GO        | 463 (0.4279)        | 646 (0.5970)        | <b>798 (0.7375)</b> | <b>846 (0.7819)</b> |
|                                  | HP        | <b>554 (0.5120)</b> | 633 (0.5850)        | 647 (0.5980)        | 660 (0.6100)        |
|                                  | MP        | 526 (0.4861)        | 681 (0.6294)        | 777 (0.7181)        | 815 (0.7532)        |
|                                  | UBERON    | 485 (0.4482)        | 633 (0.5850)        | 748 (0.6913)        | 808 (0.7468)        |
|                                  | Union     | 537 (0.4963)        | <b>691 (0.6386)</b> | 768 (0.7098)        | 808 (0.7468)        |
| EmbedPVP (TransE)                | GO        | 232 (0.2144)        | 489 (0.4519)        | 600 (0.5545)        | 688 (0.6359)        |
|                                  | HP        | 374 (0.3457)        | 593 (0.5481)        | 729 (0.6738)        | 820 (0.7579)        |
|                                  | MP        | 232 (0.2144)        | 486 (0.4492)        | 600 (0.5545)        | 688 (0.6359)        |
|                                  | UBERON    | 226 (0.2089)        | 484 (0.4473)        | 596 (0.5508)        | 688 (0.6359)        |
|                                  | Union     | 231 (0.2135)        | 496 (0.4584)        | 601 (0.5555)        | 689 (0.6368)        |
| EmbedPVP (TransR)                | GO        | 204 (0.1885)        | 453 (0.4187)        | 603 (0.5573)        | 692 (0.6396)        |
|                                  | HP        | 369 (0.3410)        | 578 (0.5342)        | 709 (0.6553)        | 812 (0.7505)        |
|                                  | MP        | 200 (0.1848)        | 474 (0.4381)        | 607 (0.5610)        | 700 (0.6470)        |
|                                  | UBERON    | 221 (0.2043)        | 468 (0.4325)        | 604 (0.5582)        | 701 (0.6479)        |
|                                  | Union     | 264 (0.2440)        | 513 (0.4741)        | 623 (0.5758)        | 744 (0.6876)        |
| EmbedPVP (DL2vec)                | GO        | 414 (0.3826)        | 554 (0.5120)        | 623 (0.5758)        | 658 (0.6081)        |
|                                  | HP        | 542 (0.5009)        | 597 (0.5518)        | 607 (0.5610)        | 613 (0.5665)        |
|                                  | MP        | 441 (0.4076)        | 576 (0.5323)        | 632 (0.5841)        | 656 (0.6063)        |
|                                  | UBERON    | 413 (0.3817)        | 574 (0.5305)        | 642 (0.5933)        | 675 (0.6238)        |
|                                  | Union     | 511 (0.4723)        | 605 (0.5591)        | 638 (0.5896)        | 669 (0.6183)        |
| EmbedPVP (OWL2vec*)              | GO        | 456 (0.4214)        | 609 (0.5628)        | 680 (0.6285)        | 703 (0.6497)        |
|                                  | HP        | 547 (0.5055)        | 595 (0.5499)        | 612 (0.5656)        | 625 (0.5776)        |
|                                  | MP        | 483 (0.4464)        | 600 (0.5545)        | 660 (0.6100)        | 691 (0.6386)        |
|                                  | UBERON    | 426 (0.3937)        | 576 (0.5323)        | 624 (0.5767)        | 655 (0.6054)        |
|                                  | Union     | 527 (0.4871)        | 610 (0.5638)        | 661 (0.6109)        | 679 (0.6275)        |

Table 4: EmbedPVP variant prediction results across several models using ClinVar dataset.



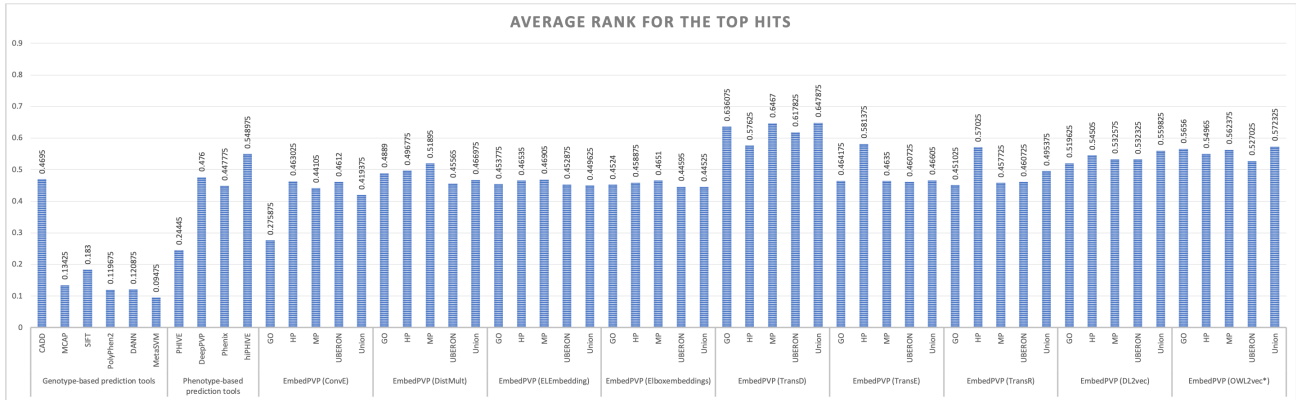

Figure 5: Average ranks for recall at 1, 10, 30, and 50 using synthetic datasets with clinical phenotypes and OMIM phenotypes (ClinVar dataset)

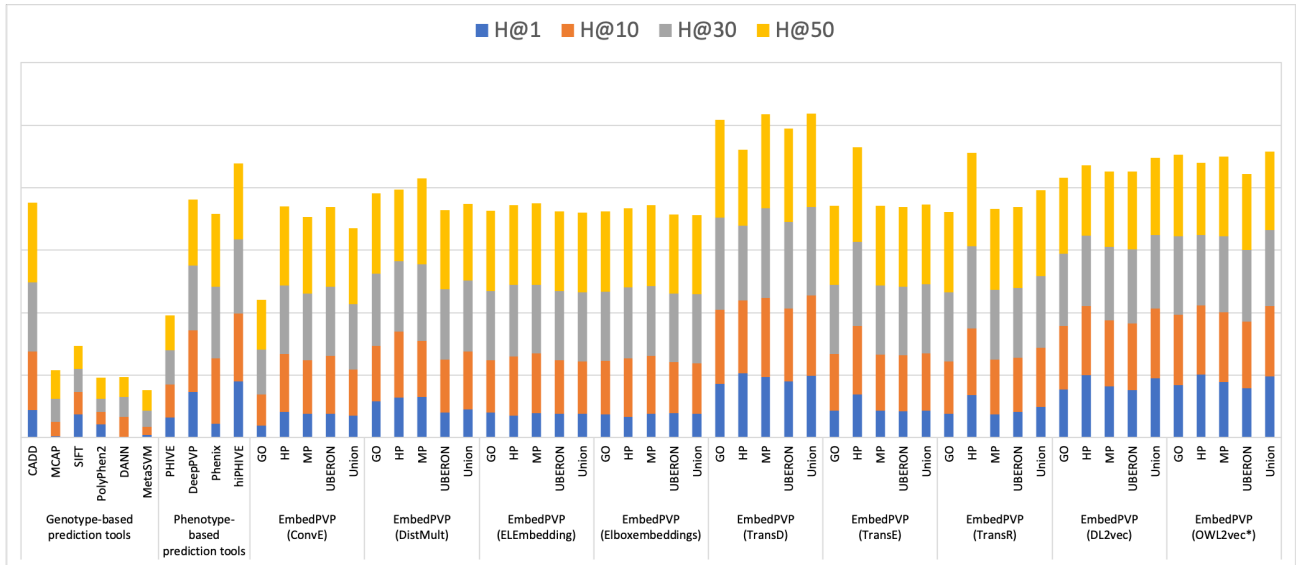

Figure 6: Recall at 1, 10, 30, and 50 using synthetic datasets with clinical phenotypes and OMIM phenotypes (ClinVar dataset)

|                                  |           | Novel Genes and Diseases |                     |                     |                     | Novel Genes and Known Diseases |                    |                    |                    |
|----------------------------------|-----------|--------------------------|---------------------|---------------------|---------------------|--------------------------------|--------------------|--------------------|--------------------|
|                                  |           | H@1                      | H@10                | H@30                | H@50                | H@1                            | H@10               | H@30               | H@50               |
| Genotype-based prediction tools  | CADD      | 68 (0.1498)              | 155 (0.3414)        | 206 (0.4537)        | 263 (0.5793)        | 8 (0.2581)                     | 14 (0.4516)        | 14 (0.4516)        | 16 (0.5161)        |
|                                  | MCAP      | 1 (0.0022)               | 33 (0.0727)         | 77 (0.1696)         | 102 (0.2247)        | 2 (0.0645)                     | 5 (0.1613)         | 6 (0.1935)         | 7 (0.2258)         |
|                                  | SIFT      | 102 (0.2247)             | 102 (0.2247)        | 102 (0.2247)        | 102 (0.2247)        | 7 (0.2258)                     | 7 (0.2258)         | 7 (0.2258)         | 7 (0.2258)         |
|                                  | PolyPhen2 | 59 (0.13)                | 59 (0.13)           | 59 (0.13)           | 100 (0.2203)        | 4 (0.1290)                     | 4 (0.1290)         | 4 (0.1290)         | 5 (0.1613)         |
|                                  | DANN      | 5 (0.0110)               | 108 (0.2379)        | 108 (0.2379)        | 108 (0.2379)        | 0 (0.0)                        | 6 (0.1935)         | 6 (0.1935)         | 6 (0.1935)         |
| Phenotype-based prediction tools | MetaSVM   | 4 (0.0088)               | 28 (0.0617)         | 43 (0.0947)         | 59 (0.1300)         | 0 (0.0)                        | 3 (0.0968)         | 6 (0.1935)         | 7 (0.2258)         |
|                                  | PHIVE     | 32 (0.0705)              | 55 (0.1211)         | 55 (0.1211)         | 55 (0.1211)         | 3 (0.0968)                     | 4 (0.1290)         | 4 (0.1290)         | 4 (0.1290)         |
|                                  | DeepPVP   | 37 (0.0815)              | 59 (0.1300)         | 70 (0.1542)         | 77 (0.1696)         | <b>20 (0.6452)</b>             | <b>23 (0.7419)</b> | <b>24 (0.7742)</b> | <b>24 (0.7742)</b> |
|                                  | Phenix    | 15 (0.0330)              | 78 (0.1718)         | 82 (0.1806)         | 89 (0.1960)         | 4 (0.1290)                     | 21 (0.6774)        | 22 (0.7097)        | 22 (0.7097)        |
| EmbedPVP (ConvE)                 | hiPHIVE   | 77 (0.1696)              | 100 (0.2203)        | 119 (0.2621)        | 121 (0.2665)        | 13 (0.4194)                    | 18 (0.5806)        | 19 (0.6129)        | 22 (0.7097)        |
|                                  | GO        | 28 (0.0617)              | 83 (0.1828)         | 125 (0.2753)        | 152 (0.3348)        | 3 (0.0968)                     | 5 (0.1613)         | 5 (0.1613)         | 5 (0.1613)         |
|                                  | HP        | 57 (0.1256)              | 154 (0.3392)        | 205 (0.4515)        | 261 (0.5749)        | 7 (0.2258)                     | 14 (0.4516)        | 14 (0.4516)        | 16 (0.5161)        |
|                                  | MP        | 52 (0.1145)              | 133 (0.2930)        | 195 (0.4295)        | 241 (0.5308)        | 7 (0.2258)                     | 13 (0.4194)        | 14 (0.4516)        | 15 (0.4839)        |
|                                  | UBERON    | 58 (0.1278)              | 154 (0.3392)        | 205 (0.4515)        | 263 (0.5793)        | 7 (0.2258)                     | 14 (0.4516)        | 14 (0.4516)        | 16 (0.5161)        |
|                                  | Union     | 51 (0.1123)              | 116 (0.2555)        | 190 (0.4185)        | 243 (0.5352)        | 5 (0.1613)                     | 9 (0.2903)         | 13 (0.4194)        | 15 (0.4839)        |
| EmbedPVP (DistMult)              | GO        | 33 (0.0727)              | 77 (0.1696)         | 143 (0.3150)        | 173 (0.3811)        | 4 (0.1290)                     | 11 (0.3548)        | 14 (0.4516)        | 15 (0.4839)        |
|                                  | HP        | 25 (0.0551)              | 46 (0.1013)         | 51 (0.1123)         | 52 (0.1145)         | 13 (0.4194)                    | 20 (0.6452)        | 21 (0.6774)        | 21 (0.6774)        |
|                                  | MP        | 53 (0.1167)              | 106 (0.2335)        | 186 (0.4097)        | 224 (0.4934)        | 8 (0.2581)                     | 10 (0.3226)        | 14 (0.4516)        | 17 (0.5484)        |
|                                  | UBERON    | 32 (0.0705)              | 121 (0.2665)        | 193 (0.4251)        | 226 (0.4978)        | 5 (0.1613)                     | 10 (0.3226)        | 12 (0.3871)        | 12 (0.3871)        |
|                                  | Union     | 15 (0.0330)              | 55 (0.1211)         | 91 (0.2004)         | 111 (0.2445)        | 7 (0.2258)                     | 14 (0.4516)        | 19 (0.6129)        | 20 (0.6452)        |
| EmbedPVP (ELEmbedding)           | GO        | 60 (0.1322)              | 138 (0.3040)        | 208 (0.4581)        | 268 (0.5903)        | 8 (0.2581)                     | 11 (0.3548)        | 14 (0.4516)        | 16 (0.5161)        |
|                                  | HP        | 30 (0.0661)              | 141 (0.3106)        | 201 (0.4427)        | 231 (0.5088)        | 7 (0.2258)                     | 13 (0.4194)        | 16 (0.5161)        | 17 (0.5484)        |
|                                  | MP        | 62 (0.1366)              | 159 (0.3502)        | 204 (0.4493)        | 264 (0.5815)        | 7 (0.2258)                     | 14 (0.4516)        | 14 (0.4516)        | 16 (0.5161)        |
|                                  | UBERON    | 56 (0.1233)              | 143 (0.3150)        | 206 (0.4537)        | 264 (0.5815)        | 7 (0.2258)                     | 11 (0.3548)        | 14 (0.4516)        | 16 (0.5161)        |
|                                  | Union     | 57 (0.1256)              | 141 (0.3106)        | 203 (0.4471)        | 266 (0.5859)        | 7 (0.2258)                     | 11 (0.3548)        | 14 (0.4516)        | 16 (0.5161)        |
| EmbedPVP (Elboxembeddings)       | GO        | 56 (0.1233)              | 140 (0.3084)        | 207 (0.4559)        | 265 (0.5837)        | 7 (0.2258)                     | 14 (0.4516)        | 14 (0.4516)        | 16 (0.5161)        |
|                                  | HP        | 30 (0.0661)              | 141 (0.3106)        | 201 (0.4427)        | 232 (0.5110)        | 7 (0.2258)                     | 13 (0.4194)        | 15 (0.4839)        | 16 (0.5161)        |
|                                  | MP        | 55 (0.1211)              | 150 (0.3304)        | 210 (0.4626)        | 262 (0.5771)        | 7 (0.2258)                     | 14 (0.4516)        | 14 (0.4516)        | 16 (0.5161)        |
|                                  | UBERON    | 61 (0.1344)              | 132 (0.2907)        | 199 (0.4383)        | 261 (0.5749)        | 7 (0.2258)                     | 12 (0.3871)        | 14 (0.4516)        | 16 (0.5161)        |
|                                  | Union     | 57 (0.1256)              | 134 (0.2952)        | 208 (0.4581)        | 262 (0.5771)        | 7 (0.2258)                     | 13 (0.4194)        | 14 (0.4516)        | 16 (0.5161)        |
| EmbedPVP (TransD)                | GO        | 51 (0.1123)              | 138 (0.3040)        | 234 (0.5154)        | 272 (0.5991)        | 10 (0.3226)                    | 11 (0.3548)        | 17 (0.5484)        | 21 (0.6774)        |
|                                  | HP        | 43 (0.0947)              | 47 (0.1035)         | 50 (0.1101)         | 59 (0.13)           | <b>20 (0.6452)</b>             | 21 (0.6774)        | 21 (0.6774)        | 21 (0.6774)        |
|                                  | MP        | 50 (0.1101)              | 127 (0.2797)        | 199 (0.4383)        | 229 (0.5044)        | 6 (0.1935)                     | 12 (0.3871)        | 14 (0.4516)        | 16 (0.5161)        |
|                                  | UBERON    | 27 (0.0595)              | 95 (0.2093)         | 175 (0.3855)        | 223 (0.4912)        | 2 (0.0645)                     | 8 (0.2581)         | 11 (0.3548)        | 14 (0.4516)        |
|                                  | Union     | 51 (0.1123)              | 119 (0.2621)        | 180 (0.3965)        | 213 (0.4692)        | <b>20 (0.6452)</b>             | <u>22 (0.7097)</u> | <u>23 (0.7419)</u> | <b>24 (0.7742)</b> |
| EmbedPVP (TransE)                | GO        | 61 (0.1344)              | 142 (0.3128)        | 206 (0.4537)        | 263 (0.5793)        | 8 (0.2581)                     | 13 (0.4194)        | 14 (0.4516)        | 16 (0.5161)        |
|                                  | HP        | <b>78 (0.1718)</b>       | <b>164 (0.3612)</b> | <b>222 (0.4890)</b> | <b>278 (0.6123)</b> | 12 (0.3871)                    | 18 (0.5806)        | 22 (0.7097)        | 22 (0.7097)        |
|                                  | MP        | 62 (0.1366)              | 138 (0.3040)        | 206 (0.4537)        | 263 (0.5793)        | 7 (0.2258)                     | 13 (0.4194)        | 14 (0.4516)        | 16 (0.5161)        |
|                                  | UBERON    | 57 (0.1256)              | 137 (0.3018)        | 203 (0.4471)        | 263 (0.5793)        | 7 (0.2258)                     | 13 (0.4194)        | 14 (0.4516)        | 16 (0.5161)        |
|                                  | Union     | 61 (0.1344)              | 146 (0.3216)        | 206 (0.4537)        | 263 (0.5793)        | 8 (0.2581)                     | 14 (0.4516)        | 14 (0.4516)        | 16 (0.5161)        |
| EmbedPVP (TransR)                | GO        | 65 (0.1432)              | 151 (0.3326)        | 213 (0.4692)        | 267 (0.5881)        | 7 (0.2258)                     | 11 (0.3548)        | 14 (0.4516)        | 16 (0.5161)        |
|                                  | HP        | 77 (0.1696)              | 158 (0.3480)        | 216 (0.4758)        | 277 (0.6101)        | 16 (0.5161)                    | 20 (0.6452)        | 22 (0.7097)        | 22 (0.7097)        |
|                                  | MP        | 52 (0.1145)              | 143 (0.3150)        | 210 (0.4626)        | 267 (0.5881)        | 7 (0.2258)                     | 13 (0.4194)        | 14 (0.4516)        | 17 (0.5484)        |
|                                  | UBERON    | 60 (0.1322)              | 142 (0.3128)        | 207 (0.4559)        | 265 (0.5837)        | 7 (0.2258)                     | 12 (0.3871)        | 14 (0.4516)        | 16 (0.5161)        |
|                                  | Union     | 68 (0.1498)              | 150 (0.3304)        | 213 (0.4692)        | 271 (0.5969)        | 10 (0.3226)                    | 13 (0.4194)        | 15 (0.4839)        | 19 (0.6129)        |
| EmbedPVP (DL2vec)                | GO        | 34 (0.0749)              | 60 (0.1322)         | 88 (0.1938)         | 109 (0.2401)        | 18 (0.5806)                    | 19 (0.6129)        | 20 (0.6452)        | 21 (0.6774)        |
|                                  | HP        | 44 (0.0969)              | 46 (0.1013)         | 46 (0.1013)         | 46 (0.1013)         | <b>20 (0.6452)</b>             | 21 (0.6774)        | 21 (0.6774)        | 21 (0.6774)        |
|                                  | MP        | 37 (0.0815)              | 54 (0.1189)         | 76 (0.1674)         | 89 (0.1960)         | 13 (0.4194)                    | 19 (0.6129)        | 20 (0.6452)        | 21 (0.6774)        |
|                                  | UBERON    | 25 (0.0551)              | 55 (0.1211)         | 90 (0.1982)         | 110 (0.2423)        | 14 (0.4516)                    | 17 (0.5484)        | 20 (0.6452)        | 20 (0.6452)        |
|                                  | Union     | 44 (0.0969)              | 62 (0.1366)         | 76 (0.1674)         | 96 (0.2115)         | 19 (0.6129)                    | 20 (0.6452)        | 21 (0.6774)        | 21 (0.6774)        |
| EmbedPVP (OWL2vec*)              | GO        | 40 (0.0881)              | 82 (0.1806)         | 123 (0.2709)        | 136 (0.2996)        | 17 (0.5484)                    | 21 (0.6774)        | 23 (0.7419)        | 23 (0.7419)        |
|                                  | HP        | 45 (0.0991)              | 48 (0.1057)         | 48 (0.1057)         | 48 (0.1057)         | <b>20 (0.6452)</b>             | 21 (0.6774)        | 21 (0.6774)        | 21 (0.6774)        |
|                                  | MP        | 42 (0.0925)              | 68 (0.1498)         | 93 (0.2048)         | 113 (0.2489)        | 17 (0.5484)                    | 20 (0.6452)        | 21 (0.6774)        | 21 (0.6774)        |
|                                  | UBERON    | 30 (0.0661)              | 54 (0.1189)         | 70 (0.1542)         | 82 (0.1806)         | 13 (0.4194)                    | 20 (0.6452)        | 21 (0.6774)        | 22 (0.7097)        |
|                                  | Union     | 46 (0.1013)              | 57 (0.1256)         | 76 (0.1674)         | 85 (0.1872)         | 19 (0.6129)                    | 20 (0.6452)        | 22 (0.7097)        | 22 (0.7097)        |

Table 5: EmbedPVP variant prediction results across several models using ClinVar dataset for the novel genes or diseases

|                                  |            | Novel Diseases and Known Genes |                    |                    |                    | Known Genes and Diseases |                     |                     |                     |
|----------------------------------|------------|--------------------------------|--------------------|--------------------|--------------------|--------------------------|---------------------|---------------------|---------------------|
|                                  |            | H@1                            | H@10               | H@30               | H@50               | H@1                      | H@10                | H@30                | H@50                |
| Genotype-based prediction tools  | CADD       | 27 (0.2432)                    | 57 (0.5135)        | 69 (0.6216)        | 75 (0.6757)        | 135 (0.2789)             | 273 (0.5640)        | 305 (0.6302)        | 328 (0.6777)        |
|                                  | MCAP       | 2 (0.0180)                     | 13 (0.1171)        | 23 (0.2072)        | 28 (0.2523)        | 6 (0.0124)               | 74 (0.1529)         | 95 (0.1963)         | 107 (0.2211)        |
|                                  | SIFT       | 17 (0.1532)                    | 17 (0.1532)        | 17 (0.1532)        | 17 (0.1532)        | 72 (0.1488)              | 72 (0.1488)         | 72 (0.1488)         | 72 (0.1488)         |
|                                  | PolyPhen2  | 11 (0.0991)                    | 11 (0.0991)        | 11 (0.0991)        | 16 (0.1441)        | 38 (0.0785)              | 38 (0.0785)         | 38 (0.0785)         | 61 (0.1260)         |
|                                  | DANN       | 1 (0.0090)                     | 14 (0.1261)        | 14 (0.1261)        | 14 (0.1261)        | 1 (0.0021)               | 44 (0.0909)         | 44 (0.0909)         | 44 (0.0909)         |
| MetaSVM                          | 7 (0.0631) | 9 (0.0811)                     | 18 (0.1622)        | 22 (0.1982)        | 9 (0.0186)         | 34 (0.0702)              | 72 (0.1488)         | 89 (0.1839)         |                     |
| Phenotype-based prediction tools | PHIVE      | 33 (0.2973)                    | 38 (0.3423)        | 41 (0.3694)        | 42 (0.3784)        | 105 (0.2169)             | 183 (0.3781)        | 194 (0.4008)        | 196 (0.4050)        |
|                                  | DeepPVP    | 37 (0.3333)                    | 73 (0.6577)        | 75 (0.6757)        | 76 (0.6847)        | 299 (0.6178)             | 371 (0.7665)        | 385 (0.7955)        | 389 (0.8037)        |
|                                  | Phenix     | 4 (0.0360)                     | 51 (0.4595)        | 80 (0.7207)        | 81 (0.7297)        | 93 (0.1921)              | 408 (0.8430)        | 427 (0.8822)        | 432 (0.8926)        |
|                                  | hiPHIVE    | <b>56 (0.5045)</b>             | 71 (0.6396)        | 78 (0.7027)        | 80 (0.7207)        | 333 (0.6880)             | 389 (0.8037)        | 417 (0.8616)        | 431 (0.8905)        |
| EmbedPVP (ConvE)                 | GO         | 9 (0.0811)                     | 32 (0.2883)        | 50 (0.4505)        | 54 (0.4865)        | 62 (0.1281)              | 148 (0.3058)        | 201 (0.4153)        | 220 (0.4545)        |
|                                  | HP         | 27 (0.2432)                    | 57 (0.5135)        | 69 (0.6216)        | 75 (0.6757)        | 128 (0.2645)             | 270 (0.5579)        | 303 (0.6260)        | 328 (0.6777)        |
|                                  | MP         | 22 (0.1982)                    | 53 (0.4775)        | 66 (0.5946)        | 70 (0.6306)        | 126 (0.2603)             | 255 (0.5269)        | 298 (0.6157)        | 330 (0.6818)        |
|                                  | UBERON     | 23 (0.2072)                    | 57 (0.5135)        | 69 (0.6216)        | 75 (0.6757)        | 116 (0.2397)             | 273 (0.5640)        | 305 (0.6302)        | 328 (0.6777)        |
|                                  | Union      | 19 (0.1712)                    | 45 (0.4054)        | 65 (0.5856)        | 73 (0.6577)        | 112 (0.2314)             | 226 (0.4669)        | 291 (0.6012)        | 326 (0.6736)        |
| EmbedPVP (DistMult)              | GO         | 31 (0.2793)                    | 61 (0.5495)        | 82 (0.7387)        | 87 (0.7838)        | 242 (0.5000)             | 326 (0.6736)        | 383 (0.7913)        | 411 (0.8492)        |
|                                  | HP         | 26 (0.2342)                    | 70 (0.6306)        | 88 (0.7928)        | 93 (0.8378)        | 276 (0.5702)             | 427 (0.8822)        | 443 (0.9153)        | 449 (0.9277)        |
|                                  | MP         | 41 (0.3694)                    | 58 (0.5225)        | 77 (0.6937)        | 85 (0.7658)        | 243 (0.5021)             | 309 (0.6384)        | 379 (0.7831)        | 411 (0.8492)        |
|                                  | UBERON     | 21 (0.1892)                    | 38 (0.3423)        | 54 (0.4865)        | 67 (0.6036)        | 154 (0.3182)             | 286 (0.5909)        | 343 (0.7087)        | 377 (0.7789)        |
|                                  | Union      | 30 (0.2703)                    | 66 (0.5946)        | 81 (0.7297)        | 89 (0.8018)        | 191 (0.3946)             | 358 (0.7397)        | 419 (0.8657)        | 433 (0.8946)        |
| EmbedPVP (ELEmbedding)           | GO         | 26 (0.2342)                    | 50 (0.4505)        | 68 (0.6126)        | 75 (0.6757)        | 120 (0.2479)             | 249 (0.5145)        | 304 (0.6281)        | 330 (0.6818)        |
|                                  | HP         | 26 (0.2342)                    | 62 (0.5586)        | 73 (0.6577)        | 79 (0.7117)        | 125 (0.2583)             | 293 (0.6054)        | 320 (0.6612)        | 361 (0.7459)        |
|                                  | MP         | 23 (0.2072)                    | 58 (0.5225)        | 69 (0.6216)        | 77 (0.6937)        | 116 (0.2397)             | 281 (0.5806)        | 304 (0.6281)        | 343 (0.7087)        |
|                                  | UBERON     | 24 (0.2162)                    | 54 (0.4865)        | 69 (0.6216)        | 76 (0.6847)        | 117 (0.2417)             | 252 (0.5207)        | 303 (0.6260)        | 329 (0.6798)        |
|                                  | Union      | 23 (0.2072)                    | 50 (0.4505)        | 68 (0.6126)        | 75 (0.6757)        | 118 (0.2438)             | 246 (0.5083)        | 304 (0.6281)        | 328 (0.6777)        |
| EmbedPVP (Elboxembeddings)       | GO         | 22 (0.1982)                    | 51 (0.4595)        | 67 (0.6036)        | 75 (0.6757)        | 116 (0.2397)             | 253 (0.5227)        | 305 (0.6302)        | 331 (0.6839)        |
|                                  | HP         | 22 (0.1982)                    | 62 (0.5586)        | 73 (0.6577)        | 79 (0.7117)        | 120 (0.2479)             | 283 (0.5847)        | 319 (0.6591)        | 353 (0.7293)        |
|                                  | MP         | 26 (0.2342)                    | 57 (0.5135)        | 67 (0.6036)        | 77 (0.6937)        | 119 (0.2459)             | 273 (0.5640)        | 305 (0.6302)        | 342 (0.7066)        |
|                                  | UBERON     | 24 (0.2162)                    | 49 (0.4414)        | 67 (0.6036)        | 74 (0.6667)        | 120 (0.2479)             | 243 (0.5021)        | 304 (0.6281)        | 328 (0.6777)        |
|                                  | Union      | 21 (0.1892)                    | 48 (0.4324)        | 67 (0.6036)        | 74 (0.6667)        | 118 (0.2438)             | 239 (0.4938)        | 304 (0.6281)        | 326 (0.6736)        |
| EmbedPVP (TransD)                | GO         | 49 (0.4414)                    | 68 (0.6126)        | 83 (0.7477)        | 86 (0.7748)        | 346 (0.7149)             | 421 (0.8698)        | 455 (0.9401)        | 458 (0.9463)        |
|                                  | HP         | 47 (0.4234)                    | <b>84 (0.7568)</b> | <b>91 (0.8198)</b> | <b>95 (0.8559)</b> | <b>436 (0.9008)</b>      | <b>472 (0.9752)</b> | <b>476 (0.9835)</b> | <b>476 (0.9835)</b> |
|                                  | MP         | 52 (0.4685)                    | 78 (0.7027)        | 87 (0.7838)        | 90 (0.8108)        | 409 (0.8450)             | 455 (0.9401)        | 468 (0.9669)        | 470 (0.9711)        |
|                                  | UBERON     | 51 (0.4595)                    | 71 (0.6396)        | 86 (0.7748)        | 91 (0.8198)        | 397 (0.8202)             | 450 (0.9298)        | 467 (0.9649)        | 471 (0.9731)        |
|                                  | Union      | 44 (0.3964)                    | 83 (0.7477)        | <b>91 (0.8198)</b> | 93 (0.8378)        | 415 (0.8574)             | 457 (0.9442)        | 464 (0.9587)        | 468 (0.9669)        |
| EmbedPVP (TransE)                | GO         | 27 (0.2432)                    | 56 (0.5045)        | 69 (0.6216)        | 75 (0.6757)        | 135 (0.2789)             | 272 (0.5620)        | 305 (0.6302)        | 328 (0.6777)        |
|                                  | HP         | 31 (0.2793)                    | 58 (0.5225)        | 70 (0.6306)        | 78 (0.7027)        | 248 (0.5124)             | 346 (0.7149)        | 407 (0.8409)        | 434 (0.8967)        |
|                                  | MP         | 27 (0.2432)                    | 56 (0.5045)        | 69 (0.6216)        | 75 (0.6757)        | 135 (0.2789)             | 273 (0.5640)        | 305 (0.6302)        | 328 (0.6777)        |
|                                  | UBERON     | 26 (0.2342)                    | 56 (0.5045)        | 68 (0.6126)        | 75 (0.6757)        | 135 (0.2789)             | 272 (0.5620)        | 305 (0.6302)        | 328 (0.6777)        |
|                                  | Union      | 26 (0.2342)                    | 57 (0.5135)        | 69 (0.6216)        | 75 (0.6757)        | 135 (0.2789)             | 273 (0.5640)        | 306 (0.6322)        | 329 (0.6798)        |
| EmbedPVP (TransR)                | GO         | 20 (0.1802)                    | 45 (0.4054)        | 65 (0.5856)        | 73 (0.6577)        | 111 (0.2293)             | 241 (0.4979)        | 305 (0.6302)        | 330 (0.6818)        |
|                                  | HP         | 27 (0.2432)                    | 57 (0.5135)        | 74 (0.6667)        | 81 (0.7297)        | 244 (0.5041)             | 337 (0.6963)        | 390 (0.8058)        | 424 (0.8760)        |
|                                  | MP         | 23 (0.2072)                    | 50 (0.4505)        | 66 (0.5946)        | 76 (0.6847)        | 117 (0.2417)             | 262 (0.5413)        | 311 (0.6426)        | 334 (0.6901)        |
|                                  | UBERON     | 24 (0.2162)                    | 51 (0.4595)        | 67 (0.6036)        | 75 (0.6757)        | 128 (0.2645)             | 257 (0.5310)        | 310 (0.6405)        | 339 (0.7004)        |
|                                  | Union      | 25 (0.2252)                    | 55 (0.4955)        | 69 (0.6216)        | 78 (0.7027)        | 159 (0.3285)             | 289 (0.5971)        | 320 (0.6612)        | 370 (0.7645)        |
| EmbedPVP (DL2vec)                | GO         | 18 (0.1622)                    | 38 (0.3423)        | 61 (0.5495)        | 68 (0.6126)        | 338 (0.6983)             | 429 (0.8864)        | 445 (0.9194)        | 451 (0.9318)        |
|                                  | HP         | 36 (0.3243)                    | 55 (0.4955)        | 62 (0.5586)        | 67 (0.6036)        | 434 (0.8967)             | 466 (0.9628)        | 469 (0.9690)        | 470 (0.9711)        |
|                                  | MP         | 17 (0.1532)                    | 39 (0.3514)        | 59 (0.5315)        | 67 (0.6036)        | 370 (0.7645)             | 458 (0.9463)        | 468 (0.9669)        | 470 (0.9711)        |
|                                  | UBERON     | 25 (0.2252)                    | 51 (0.4595)        | 66 (0.5946)        | 71 (0.6396)        | 345 (0.7128)             | 445 (0.9194)        | 459 (0.9483)        | 466 (0.9628)        |
|                                  | Union      | 31 (0.2793)                    | 55 (0.4955)        | 65 (0.5856)        | 72 (0.6486)        | 411 (0.8492)             | 459 (0.9483)        | 467 (0.9649)        | 470 (0.9711)        |
| EmbedPVP (OWL2vec*)              | GO         | 33 (0.2973)                    | 62 (0.5586)        | 70 (0.6306)        | 73 (0.6577)        | 359 (0.7417)             | 437 (0.9029)        | 455 (0.9401)        | 462 (0.9545)        |
|                                  | HP         | 40 (0.3604)                    | 54 (0.4865)        | 67 (0.6036)        | 78 (0.7027)        | 434 (0.8967)             | 463 (0.9566)        | 467 (0.9649)        | 469 (0.9690)        |
|                                  | MP         | 20 (0.1802)                    | 47 (0.4234)        | 68 (0.6126)        | 74 (0.6667)        | 397 (0.8202)             | 457 (0.9442)        | 469 (0.9690)        | 473 (0.9773)        |
|                                  | UBERON     | 23 (0.2072)                    | 52 (0.4685)        | 63 (0.5676)        | 71 (0.6396)        | 356 (0.7355)             | 441 (0.9112)        | 461 (0.9525)        | 470 (0.9711)        |
|                                  | Union      | 32 (0.2883)                    | 63 (0.5676)        | 80 (0.7207)        | 86 (0.7748)        | 424 (0.8760)             | 461 (0.9525)        | 473 (0.9773)        | <b>476 (0.9835)</b> |

Table 6: EmbedPVP variant prediction results across several models using ClinVar dataset for either known genes and/or diseases during training.

|                                  |           | Exonic              |                     |                     |                     | Non-Exonic          |                     |                     |                     |
|----------------------------------|-----------|---------------------|---------------------|---------------------|---------------------|---------------------|---------------------|---------------------|---------------------|
|                                  |           | H@1                 | H@10                | H@30                | H@50                | H@1                 | H@10                | H@30                | H@50                |
| Genotype-based prediction tools  | CADD      | 239 (0.2701)        | 364 (0.4113)        | 448 (0.5062)        | 533 (0.6023)        | 0 (0.0)             | 141 (0.7157)        | 152 (0.7716)        | 155 (0.7868)        |
|                                  | MCAP      | 11 (0.0124)         | 124 (0.1401)        | 200 (0.2260)        | 243 (0.2746)        | 0 (0.0)             | 1 (0.0051)          | 1 (0.0051)          | 1 (0.0051)          |
|                                  | SIFT      | 198 (0.2237)        | 198 (0.2237)        | 198 (0.2237)        | 198 (0.2237)        | 0 (0.0)             | 0 (0.0)             | 0 (0.0)             | 0 (0.0)             |
|                                  | PolyPhen2 | 112 (0.1266)        | 112 (0.1266)        | 112 (0.1266)        | 182 (0.2056)        | 0 (0.0)             | 0 (0.0)             | 0 (0.0)             | 0 (0.0)             |
|                                  | DANN      | 7 (0.0079)          | 172 (0.1944)        | 172 (0.1944)        | 172 (0.1944)        | 0 (0.0)             | 0 (0.0)             | 0 (0.0)             | 0 (0.0)             |
|                                  | MetaSVM   | 20 (0.0226)         | 74 (0.0836)         | 139 (0.1571)        | 177 (0.2000)        | 0 (0.0)             | 0 (0.0)             | 0 (0.0)             | 0 (0.0)             |
| Phenotype-based prediction tools | PHIVE     | 129 (0.1458)        | 208 (0.2350)        | 218 (0.2463)        | 220 (0.2486)        | 46 (0.2335)         | 76 (0.3858)         | 80 (0.4061)         | 81 (0.4112)         |
|                                  | DeepPVP   | 328 (0.3706)        | 422 (0.4768)        | 444 (0.5017)        | 453 (0.5119)        | 68 (0.3452)         | 110 (0.5584)        | 116 (0.5888)        | 119 (0.6041)        |
|                                  | Phenix    | 98 (0.1107)         | 441 (0.4983)        | 479 (0.5412)        | 490 (0.5537)        | 20 (0.1015)         | 126 (0.6396)        | 141 (0.7157)        | 143 (0.7259)        |
|                                  | hiPHIVE   | 355 (0.4011)        | 447 (0.5051)        | 499 (0.5638)        | 519 (0.5864)        | <b>132 (0.6701)</b> | 139 (0.7056)        | 142 (0.7208)        | 143 (0.7259)        |
| EmbedPVP (ConvE)                 | GO        | 100 (0.1130)        | 221 (0.2497)        | 309 (0.3492)        | 347 (0.3921)        | 2 (0.0102)          | 51 (0.2589)         | 76 (0.3858)         | 88 (0.4467)         |
|                                  | HP        | 220 (0.2486)        | 364 (0.4113)        | 447 (0.5051)        | 533 (0.6023)        | 0 (0.0)             | 137 (0.6954)        | 150 (0.7614)        | 153 (0.7766)        |
|                                  | MP        | 203 (0.2294)        | 349 (0.3944)        | 438 (0.4949)        | 516 (0.5831)        | 5 (0.0254)          | 111 (0.5635)        | 141 (0.7157)        | 146 (0.7411)        |
|                                  | UBERON    | 205 (0.2316)        | 364 (0.4113)        | 447 (0.5051)        | 533 (0.6023)        | 0 (0.0)             | 140 (0.7107)        | 152 (0.7716)        | 155 (0.7868)        |
|                                  | Union     | 186 (0.2102)        | 320 (0.3616)        | 426 (0.4814)        | 514 (0.5808)        | 2 (0.0102)          | 81 (0.4112)         | 138 (0.7005)        | 148 (0.7513)        |
| EmbedPVP (DistMult)              | GO        | 255 (0.2881)        | 371 (0.4192)        | 491 (0.5548)        | 549 (0.6203)        | 59 (0.2995)         | 109 (0.5533)        | 137 (0.6954)        | 154 (0.7360)        |
|                                  | HP        | 262 (0.2960)        | 451 (0.5096)        | 481 (0.5435)        | 489 (0.5525)        | 83 (0.4213)         | 120 (0.6091)        | 130 (0.6599)        | 134 (0.6802)        |
|                                  | MP        | 287 (0.3243)        | 374 (0.4226)        | 522 (0.5898)        | 594 (0.6712)        | 63 (0.3198)         | 115 (0.5838)        | 141 (0.7157)        | 150 (0.7614)        |
|                                  | UBERON    | 201 (0.2271)        | 346 (0.3910)        | 468 (0.5288)        | 545 (0.6158)        | 13 (0.0660)         | 115 (0.5838)        | 140 (0.7107)        | 144 (0.7310)        |
|                                  | Union     | 208 (0.2350)        | 383 (0.4328)        | 490 (0.5537)        | 528 (0.5966)        | 38 (0.1929)         | 115 (0.5838)        | 126 (0.6396)        | 133 (0.6751)        |
| EmbedPVP (EEmbedding)            | GO        | 215 (0.2429)        | 350 (0.3955)        | 448 (0.5062)        | 540 (0.6102)        | 0 (0.0)             | 104 (0.5279)        | 152 (0.7716)        | 155 (0.7868)        |
|                                  | HP        | 189 (0.2136)        | 378 (0.4271)        | 461 (0.5209)        | 538 (0.6079)        | 0 (0.0)             | 137 (0.6954)        | 155 (0.7868)        | 156 (0.7919)        |
|                                  | MP        | 209 (0.2362)        | 378 (0.4271)        | 445 (0.5028)        | 551 (0.6226)        | 0 (0.0)             | 140 (0.7107)        | 152 (0.7716)        | 155 (0.7868)        |
|                                  | UBERON    | 205 (0.2316)        | 355 (0.4011)        | 446 (0.5040)        | 537 (0.6068)        | 0 (0.0)             | 111 (0.5635)        | 152 (0.7716)        | 154 (0.7817)        |
|                                  | Union     | 206 (0.2328)        | 351 (0.3966)        | 443 (0.5006)        | 536 (0.6056)        | 0 (0.0)             | 103 (0.5228)        | 152 (0.7716)        | 155 (0.7868)        |
| EmbedPVP (Elboxembeddings)       | GO        | 202 (0.2282)        | 353 (0.3989)        | 447 (0.5051)        | 538 (0.6079)        | 0 (0.0)             | 111 (0.5635)        | 152 (0.7716)        | 155 (0.7868)        |
|                                  | HP        | 180 (0.2034)        | 374 (0.4226)        | 459 (0.5186)        | 531 (0.6000)        | 0 (0.0)             | 131 (0.6650)        | 155 (0.7868)        | 156 (0.7919)        |
|                                  | MP        | 208 (0.2350)        | 369 (0.4169)        | 450 (0.5085)        | 548 (0.6192)        | 0 (0.0)             | 131 (0.6650)        | 152 (0.7716)        | 155 (0.7868)        |
|                                  | UBERON    | 213 (0.2407)        | 349 (0.3944)        | 438 (0.4949)        | 531 (0.6000)        | 0 (0.0)             | 93 (0.4721)         | 152 (0.7716)        | 154 (0.7817)        |
|                                  | Union     | 204 (0.2305)        | 348 (0.3932)        | 447 (0.5051)        | 529 (0.5977)        | 0 (0.0)             | 92 (0.4670)         | 152 (0.7716)        | 155 (0.7868)        |
| EmbedPVP (TransD)                | GO        | 366 (0.4136)        | 506 (0.5718)        | <b>632 (0.7141)</b> | <b>680 (0.7684)</b> | 97 (0.4924)         | 140 (0.7107)        | 166 (0.8426)        | 166 (0.8426)        |
|                                  | HP        | <b>438 (0.4949)</b> | 494 (0.5582)        | 503 (0.5684)        | 515 (0.5819)        | 116 (0.5888)        | 139 (0.7056)        | 144 (0.7310)        | 145 (0.7360)        |
|                                  | MP        | 417 (0.4712)        | 540 (0.6102)        | 619 (0.6994)        | 653 (0.7379)        | 109 (0.5533)        | 141 (0.7157)        | 158 (0.8020)        | 162 (0.8223)        |
|                                  | UBERON    | 379 (0.4282)        | 503 (0.5684)        | 590 (0.6667)        | 640 (0.7232)        | 106 (0.5381)        | 130 (0.6599)        | 158 (0.8020)        | 168 (0.8528)        |
|                                  | Union     | 426 (0.4814)        | <b>548 (0.6192)</b> | 604 (0.6825)        | 637 (0.7198)        | 111 (0.5635)        | 143 (0.7259)        | <b>164 (0.8325)</b> | <b>171 (0.8680)</b> |
| EmbedPVP (TransE)                | GO        | 232 (0.2621)        | 361 (0.4079)        | 448 (0.5062)        | 533 (0.6023)        | 0 (0.0)             | 128 (0.6497)        | 152 (0.7716)        | 155 (0.7868)        |
|                                  | HP        | 308 (0.3480)        | 439 (0.4960)        | 567 (0.6407)        | 653 (0.7379)        | 66 (0.3350)         | 154 (0.7817)        | 162 (0.8223)        | 167 (0.8477)        |
|                                  | MP        | 232 (0.2621)        | 358 (0.4045)        | 448 (0.5062)        | 533 (0.6023)        | 0 (0.0)             | 128 (0.6497)        | 152 (0.7716)        | 155 (0.7868)        |
|                                  | UBERON    | 226 (0.2554)        | 359 (0.4056)        | 444 (0.5017)        | 533 (0.6023)        | 0 (0.0)             | 125 (0.6345)        | 152 (0.7716)        | 155 (0.7868)        |
|                                  | Union     | 231 (0.2610)        | 361 (0.4079)        | 449 (0.5073)        | 534 (0.6034)        | 0 (0.0)             | 135 (0.6853)        | 152 (0.7716)        | 155 (0.7868)        |
| EmbedPVP (TransR)                | GO        | 204 (0.2305)        | 356 (0.4023)        | 451 (0.5096)        | 537 (0.6068)        | 0 (0.0)             | 97 (0.4924)         | 152 (0.7716)        | 155 (0.7868)        |
|                                  | HP        | 313 (0.3537)        | 432 (0.4881)        | 549 (0.6203)        | 648 (0.7322)        | 56 (0.2843)         | <b>146 (0.7411)</b> | 160 (0.8122)        | 164 (0.8325)        |
|                                  | MP        | 200 (0.2260)        | 362 (0.4090)        | 455 (0.5141)        | 545 (0.6158)        | 0 (0.0)             | 112 (0.5685)        | 152 (0.7716)        | 155 (0.7868)        |
|                                  | UBERON    | 219 (0.2475)        | 362 (0.4090)        | 452 (0.5107)        | 546 (0.6169)        | 2 (0.0102)          | 106 (0.5381)        | 152 (0.7716)        | 155 (0.7868)        |
|                                  | Union     | 251 (0.2836)        | 376 (0.4249)        | 469 (0.5299)        | 586 (0.6621)        | 13 (0.0660)         | 137 (0.6954)        | 154 (0.7817)        | 158 (0.8020)        |
| EmbedPVP (DL2vec)                | GO        | 327 (0.3695)        | 432 (0.4881)        | 486 (0.5492)        | 515 (0.5819)        | 87 (0.4416)         | 122 (0.6193)        | 137 (0.6954)        | 143 (0.7259)        |
|                                  | HP        | 428 (0.4836)        | 467 (0.5277)        | 474 (0.5356)        | 479 (0.5412)        | 114 (0.5787)        | 130 (0.6599)        | 133 (0.6751)        | 134 (0.6802)        |
|                                  | MP        | 338 (0.3819)        | 451 (0.5096)        | 499 (0.5638)        | 519 (0.5864)        | 103 (0.5228)        | 125 (0.6345)        | 133 (0.6751)        | 137 (0.6954)        |
|                                  | UBERON    | 332 (0.3751)        | 450 (0.5085)        | 501 (0.5661)        | 530 (0.5989)        | 81 (0.4112)         | 124 (0.6294)        | 141 (0.7157)        | 145 (0.7360)        |
|                                  | Union     | 403 (0.4554)        | 477 (0.5390)        | 503 (0.5684)        | 525 (0.5932)        | 108 (0.5482)        | 128 (0.6497)        | 135 (0.6853)        | 144 (0.7310)        |
| EmbedPVP (OWL2vec*)              | GO        | 355 (0.4011)        | 477 (0.5390)        | 540 (0.6102)        | 558 (0.6305)        | 101 (0.5127)        | 132 (0.6701)        | 140 (0.7107)        | 145 (0.7360)        |
|                                  | HP        | 432 (0.4881)        | 467 (0.5277)        | 479 (0.5412)        | 486 (0.5492)        | 115 (0.5838)        | 128 (0.6497)        | 133 (0.6751)        | 139 (0.7056)        |
|                                  | MP        | 373 (0.4215)        | 466 (0.5266)        | 516 (0.5831)        | 542 (0.6124)        | 110 (0.5584)        | 134 (0.6802)        | 144 (0.7310)        | 149 (0.7563)        |
|                                  | UBERON    | 335 (0.3785)        | 450 (0.5085)        | 491 (0.5548)        | 514 (0.5808)        | 91 (0.4619)         | 126 (0.6396)        | 133 (0.6751)        | 141 (0.7157)        |
|                                  | Union     | 411 (0.4644)        | 479 (0.5412)        | 518 (0.5853)        | 533 (0.6023)        | 116 (0.5888)        | 131 (0.6650)        | 143 (0.7259)        | 146 (0.7411)        |

Table 7: EmbedPVP variant prediction results across several models using ClinVar dataset for the exonic and non-exonic variants

## 2.1.4 Evaluations for the variants in genes with no phenotype annotations

Table 8.

|                                  |           | H@1                | H@10                | H@30                | H@50                |
|----------------------------------|-----------|--------------------|---------------------|---------------------|---------------------|
| Genotype-based prediction tools  | CADD      | 71 (0.1788)        | 145 (0.3652)        | 189 (0.4761)        | 239 (0.6020)        |
|                                  | MCAP      | 1 (0.0025)         | 32 (0.0806)         | 66 (0.1662)         | 86 (0.2166)         |
|                                  | SIFT      | <b>95 (0.2393)</b> | 95 (0.2393)         | 95 (0.2393)         | 95 (0.2393)         |
|                                  | PolyPhen2 | 45 (0.1134)        | 45 (0.1134)         | 45 (0.1134)         | 82 (0.2065)         |
|                                  | DANN      | 5 (0.0126)         | 96 (0.2418)         | 96 (0.2418)         | 96 (0.2418)         |
|                                  | MetaSVM   | 4 (0.0101)         | 25 (0.0630)         | 39 (0.0982)         | 53 (0.1335)         |
| Phenotype-based prediction tools | PHIVE     | 24 (0.0605)        | 41 (0.1033)         | 42 (0.1058)         | 42 (0.1058)         |
|                                  | DeepPVP   | 36 (0.0907)        | 53 (0.1335)         | 61 (0.1537)         | 68 (0.1713)         |
|                                  | Phenix    | 8 (0.0202)         | 63 (0.1587)         | 68 (0.1713)         | 72 (0.1814)         |
|                                  | hiPHIVE   | 63 (0.1587)        | 89 (0.2242)         | 103 (0.2594)        | 105 (0.2645)        |
| EmbedPVP (ConvE)                 | GO        | 28 (0.0705)        | 83 (0.2091)         | 120 (0.3023)        | 141 (0.3552)        |
|                                  | HP        | 61 (0.1537)        | 145 (0.3652)        | 189 (0.4761)        | 238 (0.5995)        |
|                                  | MP        | 56 (0.1411)        | 132 (0.3325)        | 183 (0.4610)        | 225 (0.5668)        |
|                                  | UBERON    | 60 (0.1511)        | 145 (0.3652)        | 188 (0.4736)        | 239 (0.6020)        |
|                                  | Union     | 50 (0.1259)        | 113 (0.2846)        | 173 (0.4358)        | 221 (0.5567)        |
| EmbedPVP (DistMult)              | GO        | 43 (0.1083)        | 84 (0.2116)         | 140 (0.3526)        | 164 (0.4131)        |
|                                  | HP        | 2 (0.0050)         | 8 (0.0202)          | 11 (0.0277)         | 13 (0.0327)         |
|                                  | MP        | 57 (0.1436)        | 107 (0.2695)        | 177 (0.4458)        | 214 (0.5390)        |
|                                  | UBERON    | 36 (0.0907)        | 116 (0.2922)        | 180 (0.4534)        | 208 (0.5239)        |
|                                  | Union     | 9 (0.0227)         | 36 (0.0907)         | 65 (0.1637)         | 84 (0.2116)         |
| EmbedPVP (ELEmbedding)           | GO        | 64 (0.1612)        | 133 (0.3350)        | 191 (0.4811)        | 242 (0.6096)        |
|                                  | HP        | 34 (0.0856)        | 128 (0.3224)        | 178 (0.4484)        | 203 (0.5113)        |
|                                  | MP        | 64 (0.1612)        | <b>153 (0.3854)</b> | 187 (0.4710)        | 236 (0.5945)        |
|                                  | UBERON    | 58 (0.1461)        | 135 (0.3401)        | 189 (0.4761)        | 238 (0.5995)        |
|                                  | Union     | 59 (0.1486)        | 133 (0.3350)        | 186 (0.4685)        | 241 (0.6071)        |
| EmbedPVP (Elboxembeddings)       | GO        | 60 (0.1511)        | 135 (0.3401)        | 189 (0.4761)        | 239 (0.6020)        |
|                                  | HP        | 33 (0.0831)        | 128 (0.3224)        | 178 (0.4484)        | 205 (0.5164)        |
|                                  | MP        | 58 (0.1461)        | 144 (0.3627)        | 192 (0.4836)        | 236 (0.5945)        |
|                                  | UBERON    | 64 (0.1612)        | 129 (0.3249)        | 182 (0.4584)        | 237 (0.5970)        |
|                                  | Union     | 59 (0.1486)        | 130 (0.3275)        | 191 (0.4811)        | 236 (0.5945)        |
| EmbedPVP (TransD)                | GO        | 64 (0.1612)        | 138 (0.3476)        | 220 (0.5542)        | 249 (0.6272)        |
|                                  | HP        | 19 (0.0479)        | 27 (0.0680)         | 29 (0.0730)         | 34 (0.0856)         |
|                                  | MP        | 61 (0.1537)        | 133 (0.3350)        | <b>196 (0.4937)</b> | 218 (0.5491)        |
|                                  | UBERON    | 46 (0.1159)        | 107 (0.2695)        | 174 (0.4383)        | 211 (0.5315)        |
|                                  | Union     | 20 (0.0504)        | 87 (0.2191)         | 144 (0.3627)        | 175 (0.4408)        |
| EmbedPVP (TransE)                | GO        | 64 (0.1612)        | 136 (0.3426)        | 189 (0.4761)        | 239 (0.6020)        |
|                                  | HP        | 65 (0.1637)        | 143 (0.3602)        | 189 (0.4761)        | 239 (0.6020)        |
|                                  | MP        | 66 (0.1662)        | 133 (0.3350)        | 189 (0.4761)        | 239 (0.6020)        |
|                                  | UBERON    | 60 (0.1511)        | 132 (0.3325)        | 186 (0.4685)        | 239 (0.6020)        |
|                                  | Union     | 63 (0.1587)        | 137 (0.3451)        | 189 (0.4761)        | 239 (0.6020)        |
| EmbedPVP (TransR)                | GO        | <u>67 (0.1688)</u> | <u>145 (0.3652)</u> | <u>193 (0.4861)</u> | <b>243 (0.6121)</b> |
|                                  | HP        | 63 (0.1587)        | 138 (0.3476)        | 185 (0.4660)        | 239 (0.6020)        |
|                                  | MP        | 52 (0.1310)        | 136 (0.3426)        | 192 (0.4836)        | 240 (0.6045)        |
|                                  | UBERON    | 63 (0.1587)        | 137 (0.3451)        | 190 (0.4786)        | 238 (0.5995)        |
|                                  | Union     | 62 (0.1562)        | 135 (0.3401)        | 190 (0.4786)        | 241 (0.6071)        |
| EmbedPVP (DL2vec)                | GO        | 19 (0.0479)        | 41 (0.1033)         | 67 (0.1688)         | 88 (0.2217)         |
|                                  | HP        | 18 (0.0453)        | 21 (0.0529)         | 23 (0.0579)         | 23 (0.0579)         |
|                                  | MP        | 18 (0.0453)        | 36 (0.0907)         | 55 (0.1385)         | 67 (0.1688)         |
|                                  | UBERON    | 23 (0.0579)        | 42 (0.1058)         | 72 (0.1814)         | 88 (0.2217)         |
|                                  | Union     | 17 (0.0428)        | 38 (0.0957)         | 54 (0.1360)         | 73 (0.1839)         |
| EmbedPVP (OWL2vec*)              | GO        | 26 (0.0655)        | 61 (0.1537)         | 104 (0.2620)        | 117 (0.2947)        |
|                                  | HP        | 19 (0.0479)        | 23 (0.0579)         | 24 (0.0605)         | 24 (0.0605)         |
|                                  | MP        | 21 (0.0529)        | 47 (0.1184)         | 70 (0.1763)         | 89 (0.2242)         |
|                                  | UBERON    | 20 (0.0504)        | 32 (0.0806)         | 49 (0.1234)         | 60 (0.1511)         |
|                                  | Union     | 15 (0.0378)        | 31 (0.0781)         | 50 (0.1259)         | 60 (0.1511)         |

Table 8: EmbedPVP evaluations for the variants in genes with no phenotype annotations

## 2.1.5 Evaluations for the variants in intergenic and overlapping genes

Table 9.

|                                  |           | H@1                | H@10               | H@30               | H@50               |
|----------------------------------|-----------|--------------------|--------------------|--------------------|--------------------|
| Genotype-based prediction tools  | CADD      | 30 (0.2778)        | 53 (0.4907)        | 59 (0.5463)        | 66 (0.6111)        |
|                                  | MCAP      | 3 (0.0278)         | 7 (0.0648)         | 14 (0.1296)        | 18 (0.1667)        |
|                                  | SIFT      | 14 (0.1296)        | 14 (0.1296)        | 14 (0.1296)        | 14 (0.1296)        |
|                                  | PolyPhen2 | 13 (0.1204)        | 13 (0.1204)        | 13 (0.1204)        | 16 (0.1481)        |
|                                  | DANN      | 0 (0.0)            | 12 (0.1111)        | 12 (0.1111)        | 12 (0.1111)        |
|                                  | MetaSVM   | 0 (0.0)            | 4 (0.0370)         | 14 (0.1296)        | 16 (0.1481)        |
| Phenotype-based prediction tools | PHIVE     | 18 (0.1667)        | 40 (0.3704)        | 42 (0.3889)        | 42 (0.3889)        |
|                                  | DeepPVP   | 42 (0.3889)        | 60 (0.5556)        | 64 (0.5926)        | 65 (0.6019)        |
|                                  | Phenix    | 17 (0.1574)        | 72 (0.6667)        | 75 (0.6944)        | 78 (0.7222)        |
|                                  | hiPHIVE   | 59 (0.5463)        | 63 (0.5833)        | 66 (0.6111)        | 68 (0.6296)        |
| EmbedPVP (ConvE)                 | GO        | 17 (0.1574)        | 36 (0.3333)        | 47 (0.4352)        | 51 (0.4722)        |
|                                  | HP        | 29 (0.2685)        | 52 (0.4815)        | 59 (0.5463)        | 66 (0.6111)        |
|                                  | MP        | 30 (0.2778)        | 54 (0.5)           | 57 (0.5278)        | 62 (0.5741)        |
|                                  | UBERON    | 28 (0.2593)        | 53 (0.4907)        | 59 (0.5463)        | 66 (0.6111)        |
|                                  | Union     | 30 (0.2778)        | 44 (0.4074)        | 57 (0.5278)        | 64 (0.5926)        |
| EmbedPVP (DistMult)              | GO        | 41 (0.3796)        | 55 (0.5093)        | 68 (0.6296)        | 72 (0.6667)        |
|                                  | HP        | 45 (0.4167)        | 71 (0.6574)        | 74 (0.6852)        | 77 (0.7130)        |
|                                  | MP        | 42 (0.3889)        | 55 (0.5093)        | 65 (0.6019)        | 71 (0.6574)        |
|                                  | UBERON    | 27 (0.25)          | 48 (0.4444)        | 59 (0.5463)        | 71 (0.6574)        |
|                                  | Union     | 40 (0.3704)        | 58 (0.5370)        | 71 (0.6574)        | 76 (0.7037)        |
| EmbedPVP (ELEmbedding)           | GO        | 28 (0.2593)        | 47 (0.4352)        | 59 (0.5463)        | 67 (0.6204)        |
|                                  | HP        | 28 (0.2593)        | 57 (0.5278)        | 65 (0.6019)        | 69 (0.6389)        |
|                                  | MP        | 28 (0.2593)        | 54 (0.5000)        | 59 (0.5463)        | 70 (0.6481)        |
|                                  | UBERON    | 28 (0.2593)        | 47 (0.4352)        | 59 (0.5463)        | 69 (0.6389)        |
|                                  | Union     | 29 (0.2685)        | 48 (0.4444)        | 59 (0.5463)        | 67 (0.6204)        |
| EmbedPVP (Elboxembeddings)       | GO        | 27 (0.25)          | 51 (0.4722)        | 59 (0.5463)        | 68 (0.6296)        |
|                                  | HP        | 27 (0.25)          | 55 (0.5093)        | 64 (0.5926)        | 68 (0.6296)        |
|                                  | MP        | 29 (0.2685)        | 53 (0.4907)        | 59 (0.5463)        | 68 (0.6296)        |
|                                  | UBERON    | 28 (0.2593)        | 49 (0.4537)        | 59 (0.5463)        | 65 (0.6019)        |
|                                  | Union     | 29 (0.2685)        | 47 (0.4352)        | 59 (0.5463)        | 67 (0.6204)        |
| EmbedPVP (TransD)                | GO        | 61 (0.5648)        | 73 (0.6759)        | 87 (0.8056)        | 89 (0.8241)        |
|                                  | HP        | 65 (0.6019)        | 76 (0.7037)        | 78 (0.7222)        | 78 (0.7222)        |
|                                  | MP        | 63 (0.5833)        | 71 (0.6574)        | 79 (0.7315)        | 83 (0.7685)        |
|                                  | UBERON    | 61 (0.5648)        | 69 (0.6389)        | 73 (0.6759)        | 78 (0.7222)        |
|                                  | Union     | 65 (0.6019)        | <b>79 (0.7315)</b> | <b>84 (0.7778)</b> | <b>87 (0.8056)</b> |
| EmbedPVP (TransE)                | GO        | 30 (0.2778)        | 52 (0.4815)        | 59 (0.5463)        | 66 (0.6111)        |
|                                  | HP        | 42 (0.3889)        | 66 (0.6111)        | 73 (0.6759)        | 78 (0.7222)        |
|                                  | MP        | 29 (0.2685)        | 52 (0.4815)        | 59 (0.5463)        | 66 (0.6111)        |
|                                  | UBERON    | 29 (0.2685)        | 52 (0.4815)        | 59 (0.5463)        | 66 (0.6111)        |
|                                  | Union     | 30 (0.2778)        | 53 (0.4907)        | 59 (0.5463)        | 66 (0.6111)        |
| EmbedPVP (TransR)                | GO        | 28 (0.2593)        | 47 (0.4352)        | 60 (0.5556)        | 65 (0.6019)        |
|                                  | HP        | 42 (0.3889)        | 62 (0.5741)        | 70 (0.6481)        | 77 (0.7130)        |
|                                  | MP        | 26 (0.2407)        | 51 (0.4722)        | 60 (0.5556)        | 69 (0.6389)        |
|                                  | UBERON    | 29 (0.2685)        | 50 (0.4630)        | 59 (0.5463)        | 67 (0.6204)        |
|                                  | Union     | 34 (0.3148)        | 56 (0.5185)        | 61 (0.5648)        | 71 (0.6574)        |
| EmbedPVP (DL2vec)                | GO        | 56 (0.5185)        | 74 (0.6852)        | 76 (0.7037)        | 77 (0.7130)        |
|                                  | HP        | 65 (0.6019)        | 75 (0.6944)        | 76 (0.7037)        | 76 (0.7037)        |
|                                  | MP        | 64 (0.5926)        | 72 (0.6667)        | 76 (0.7037)        | 77 (0.7130)        |
|                                  | UBERON    | 57 (0.5278)        | 67 (0.6204)        | 72 (0.6667)        | 76 (0.7037)        |
|                                  | Union     | 64 (0.5926)        | 72 (0.6667)        | 73 (0.6759)        | 76 (0.7037)        |
| EmbedPVP (OWL2vec*)              | GO        | 61 (0.5648)        | 70 (0.6481)        | 79 (0.7315)        | 80 (0.7407)        |
|                                  | HP        | 66 (0.6111)        | 74 (0.6852)        | 75 (0.6944)        | 76 (0.7037)        |
|                                  | MP        | 61 (0.5648)        | 73 (0.6759)        | 76 (0.7037)        | 78 (0.7222)        |
|                                  | UBERON    | 62 (0.5741)        | 74 (0.6852)        | 75 (0.6944)        | 77 (0.7130)        |
|                                  | Union     | <b>68 (0.6296)</b> | 74 (0.6852)        | 80 (0.7407)        | 82 (0.7593)        |

Table 9: EmbedPVP evaluations for the variants within overlapping genes

## 2.2 Evaluations for the variants in non-exonic regions

Evaluating variants in non-exonic regions is crucial as they can significantly impact gene expression and regulation. These regions contain important regulatory elements, such as enhancers and silencers, that play a crucial role in the expression of neighboring genes. By analyzing these variants, we can comprehensively understand the genetic factors that contribute to various diseases and conditions [1]. Therefore, we further extended our evaluation to include variants in non-exonic regions, specifically focusing on capturing phenotype annotations from the neighboring genes. Using the PAVS benchmark dataset, we identified a total of 296 non-exonic variants, including intronic, splicing, UTR5, UTR3, upstream, and ncRNA variants. The results are shown in Supplementary Table 2. Table 7 shows the results obtained using the ClinVar dataset with 197 non-exonic variants. The results highlight that our EmbedPVP models continue to outperform other state-of-the-art methods, even when considering variants in these non-exonic regions.

## 2.3 Evaluations for variants in intergenic and overlapping genes

To further assess the performance of EmbedPVP in capturing variants located in overlapping or intergenic regions, we used the maximum similarity score among the genes surrounding the variants. To evaluate the effectiveness of our approach, we collected a new set of variants (108 variants) from ClinVar, in which the variants are within the intergenic region or overlapping genes. The results presented in Supplementary Table 9 demonstrate that our method outperforms other approaches across various metrics. Specifically, the EmbedPVP (TransD) model is considered the most effective method in capturing the genomic context and achieves better performance compared to the other methods considered in this study. Also, EmbedPVP performs better with other embedding methods, such as DL2vec and OWL2vec\*, compared to the other methods. Using this approach, in which we incorporate information for the surrounding genes, enables us to consider the genomic information surrounding the variants and thereby enhances the performance of EmbedPVP to predict other types of variants compared to other methods. By considering the genes in proximity to the variants, we ensure that the models capture the relevant genomic context necessary for accurately predicting the impact of these variants on phenotypes or diseases.

## 2.4 Evaluations for variants in genes with no phenotype annotations

Since we utilize different types of features characterized through the use of ontologies, our method can be applied to a much larger number of genes for which the functions, sites of expression, phenotypes, or interactions with other genes are known. To evaluate our method, we focused on subsets of variants (397 variants) collected from ClinVar that corresponded to genes with no human phenotype annotations. We obtained a total of 397 variants with Gene Ontology (GO) annotations. Using the gene functions in addition to the enriched knowledge graph, we ranked the variants and assessed their performance. The results are presented in Supplementary

|                                  |                   | Using the Clinical Phenotypes |                     |                     |                      |               |               | Using OMIM Phenotypes |                      |                      |                      |               |               |        |
|----------------------------------|-------------------|-------------------------------|---------------------|---------------------|----------------------|---------------|---------------|-----------------------|----------------------|----------------------|----------------------|---------------|---------------|--------|
|                                  |                   | H@1                           | H@10                | H@30                | H@50                 | ROCAUC        | AUPR          | H@1                   | H@10                 | H@30                 | H@50                 | ROCAUC        | AUPR          |        |
| Genotype-based prediction tools  | CADD              | 116 (0.0759)                  | 266 (0.1741)        | 467 (0.3056)        | 591 (0.3868)         | 0.9778        | 0.0494        | 116 (0.0759)          | 266 (0.1741)         | 467 (0.3056)         | 591 (0.3868)         | 0.9778        | 0.0494        |        |
|                                  | MCAP              | 4 (0.0026)                    | 261 (0.1708)        | 442 (0.2893)        | 511 (0.3344)         | 0.6389        | 0.0076        | 4 (0.0026)            | 261 (0.1708)         | 442 (0.2893)         | 511 (0.3344)         | 0.6389        | 0.0076        |        |
|                                  | SIFT              | 201 (0.1315)                  | 201 (0.1315)        | 201 (0.1315)        | 201 (0.1315)         | 0.6436        | 0.0736        | 201 (0.1315)          | 201 (0.1315)         | 201 (0.1315)         | 201 (0.1315)         | 0.6436        | 0.0736        |        |
|                                  | PolyPhen2         | 127 (0.0831)                  | 127 (0.0831)        | 127 (0.0831)        | 226 (0.1479)         | 0.6465        | 0.0481        | 127 (0.0831)          | 127 (0.0831)         | 127 (0.0831)         | 226 (0.1479)         | 0.6465        | 0.0481        |        |
|                                  | DANN              | 21 (0.0137)                   | 263 (0.1721)        | 263 (0.1721)        | 263 (0.1721)         | 0.8422        | 0.0115        | 21 (0.0137)           | 263 (0.1721)         | 263 (0.1721)         | 263 (0.1721)         | 0.8422        | 0.0115        |        |
|                                  | MetaSVM           | 20 (0.0131)                   | 111 (0.0726)        | 318 (0.2081)        | 406 (0.2657)         | 0.651         | 0.0108        | 20 (0.0131)           | 111 (0.0726)         | 318 (0.2081)         | 406 (0.2657)         | 0.651         | 0.0108        |        |
| Phenotype-based prediction tools | PHIVE             | 181 (0.1185)                  | 325 (0.2127)        | 364 (0.2382)        | 380 (0.2487)         | 0.8047        | 0.0709        | 346 (0.2264)          | 496 (0.3246)         | 518 (0.339)          | 523 (0.3423)         | 0.8151        | 0.1477        |        |
|                                  | DeepPVP           | 221 (0.1446)                  | 661 (0.4326)        | 762 (0.4987)        | 795 (0.5203)         | 0.7662        | 0.1389        | 449 (0.2938)          | 858 (0.5615)         | 905 (0.5923)         | 924 (0.6047)         | 0.8041        | 0.2853        |        |
|                                  | Phenix            | 472 (0.3089)                  | 628 (0.411)         | 746 (0.4882)        | 788 (0.5157)         | 0.8148        | 0.2154        | <b>1104 (0.7225)</b>  | 1130 (0.7395)        | 1153 (0.7546)        | 1159 (0.7585)        | 0.8206        | 0.6275        |        |
|                                  | hiPHIVE           | 431 (0.2821)                  | 653 (0.4274)        | 768 (0.5026)        | 809 (0.5295)         | 0.8098        | 0.1982        | 868 (0.5681)          | 1025 (0.6708)        | 1149 (0.752)         | 1184 (0.7749)        | 0.8151        | 0.4693        |        |
| EmbedPVP (TransD)                | GO                | 307 (0.2009)                  | 563 (0.3685)        | 726 (0.4751)        | 829 (0.5425)         | 0.9524        | 0.1386        | 670 (0.4385)          | 894 (0.5851)         | 1006 (0.6584)        | 1042 (0.6819)        | 0.9795        | 0.3464        |        |
|                                  |                   | 207 (0.1355)                  | 388 (0.2539)        | 535 (0.3501)        | 678 (0.4437)         | 0.8969        | 0.0852        | 207 (0.1355)          | 388 (0.2539)         | 535 (0.3501)         | 678 (0.4437)         | 0.8969        | 0.0852        |        |
|                                  | HP                | <b>482 (0.3154)</b>           | <b>846 (0.5537)</b> | <b>1007 (0.659)</b> | <b>1056 (0.6911)</b> | <b>0.9895</b> | <b>0.2507</b> | 996 (0.6518)          | 1230 (0.805)         | 1352 (0.8848)        | <b>1391 (0.9103)</b> | <b>0.996</b>  | <b>0.5865</b> |        |
|                                  |                   | 207 (0.1355)                  | 388 (0.2539)        | 535 (0.3501)        | 678 (0.4437)         | 0.8969        | 0.0852        | 207 (0.1355)          | 388 (0.2539)         | 535 (0.3501)         | 678 (0.4437)         | 0.8969        | 0.0852        |        |
|                                  | MP                | 396 (0.2592)                  | 675 (0.4418)        | 868 (0.5681)        | 947 (0.6198)         | 0.9587        | 0.1869        | 779 (0.5098)          | 922 (0.6034)         | 1031 (0.6747)        | 1072 (0.7016)        | 0.9822        | 0.412         |        |
|                                  |                   | 207 (0.1355)                  | 388 (0.2539)        | 535 (0.3501)        | 678 (0.4437)         | 0.8969        | 0.0852        | 207 (0.1355)          | 388 (0.2539)         | 535 (0.3501)         | 678 (0.4437)         | 0.8969        | 0.0852        |        |
|                                  | UBERON            | 287 (0.1878)                  | 509 (0.3331)        | 674 (0.4411)        | 800 (0.5236)         | 0.9493        | 0.1278        | 699 (0.4575)          | 892 (0.5838)         | 995 (0.6512)         | 1023 (0.6695)        | 0.9775        | 0.3594        |        |
|                                  |                   | 207 (0.1355)                  | 388 (0.2539)        | 535 (0.3501)        | 678 (0.4437)         | 0.8969        | 0.0852        | 207 (0.1355)          | 388 (0.2539)         | 535 (0.3501)         | 678 (0.4437)         | 0.8969        | 0.0852        |        |
|                                  | Union             | 409 (0.2677)                  | 639 (0.4182)        | 833 (0.5452)        | 928 (0.6073)         | 0.9581        | 0.1934        | 899 (0.5884)          | 1086 (0.7107)        | 1158 (0.7579)        | 1245 (0.8148)        | 0.9933        | 0.5087        |        |
|                                  |                   | 207 (0.1355)                  | 388 (0.2539)        | 535 (0.3501)        | 678 (0.4437)         | 0.8969        | 0.0852        | 207 (0.1355)          | 388 (0.2539)         | 535 (0.3501)         | 678 (0.4437)         | 0.8969        | 0.0852        |        |
|                                  | EmbedPVP (DL2vec) | GO                            | 152 (0.0995)        | 382 (0.25)          | 554 (0.3626)         | 614 (0.4018)  | 0.9282        | 0.0659                | 491 (0.3213)         | 804 (0.5262)         | 944 (0.6178)         | 1010 (0.661)  | 0.9787        | 0.2485 |
|                                  |                   |                               | 12 (0.0079)         | 61 (0.0399)         | 94 (0.0615)          | 114 (0.0746)  | 0.789         | 0.0044                | 6 (0.0039)           | 20 (0.0131)          | 43 (0.0281)          | 59 (0.0386)   | 0.7481        | 0.0021 |
| HP                               |                   | 362 (0.2369)                  | 666 (0.4359)        | 787 (0.5151)        | 826 (0.5406)         | 0.9867        | 0.1758        | 1011 (0.6616)         | 1300 (0.8508)        | 1366 (0.894)         | 1384 (0.9058)        | 0.9942        | 0.6168        |        |
|                                  |                   | 372 (0.2435)                  | 691 (0.4522)        | 832 (0.5445)        | 876 (0.5733)         | 0.9834        | 0.182         | 830 (0.5432)          | 1117 (0.731)         | 1218 (0.7971)        | 1272 (0.8325)        | 0.9929        | 0.4758        |        |
| MP                               |                   | 255 (0.1669)                  | 491 (0.3213)        | 639 (0.4182)        | 701 (0.4588)         | 0.9501        | 0.1128        | 639 (0.4182)          | 914 (0.5982)         | 1043 (0.6826)        | 1106 (0.7238)        | 0.9804        | 0.3386        |        |
|                                  |                   | 33 (0.0216)                   | 130 (0.0851)        | 195 (0.1276)        | 237 (0.1551)         | 0.8579        | 0.0127        | 29 (0.019)            | 173 (0.1132)         | 233 (0.1525)         | 268 (0.1754)         | 0.8665        | 0.0117        |        |
| UBERON                           |                   | 174 (0.1139)                  | 390 (0.2552)        | 498 (0.3259)        | 556 (0.3639)         | 0.8928        | 0.0751        | 539 (0.3527)          | 801 (0.5242)         | 904 (0.5916)         | 940 (0.6152)         | 0.9271        | 0.2713        |        |
|                                  |                   | 44 (0.0288)                   | 163 (0.1067)        | 276 (0.1806)        | 350 (0.2291)         | 0.7896        | 0.0175        | 45 (0.0295)           | 195 (0.1276)         | 301 (0.197)          | 372 (0.2435)         | 0.7879        | 0.0188        |        |
| Union                            |                   | 358 (0.2343)                  | 636 (0.4162)        | 771 (0.5046)        | 824 (0.5393)         | 0.9605        | 0.1673        | 950 (0.6217)          | 1216 (0.7958)        | 1310 (0.8573)        | 1353 (0.8855)        | 0.9936        | 0.5625        |        |
|                                  |                   | 292 (0.1911)                  | 585 (0.3829)        | 729 (0.4771)        | 790 (0.517)          | 0.9635        | 0.1356        | 275 (0.18)            | 710 (0.4647)         | 858 (0.5615)         | 918 (0.6008)         | 0.9832        | 0.1404        |        |
| EmbedPVP (OWL2vec*)              |                   | GO                            | 188 (0.123)         | 385 (0.252)         | 525 (0.3436)         | 592 (0.3874)  | 0.919         | 0.0797                | 557 (0.3645)         | 876 (0.5733)         | 1011 (0.6616)        | 1059 (0.6931) | 0.978         | 0.2935 |
|                                  |                   |                               | 2 (0.0013)          | 40 (0.0262)         | 70 (0.0458)          | 85 (0.0556)   | 0.784         | 0.0009                | 10 (0.0065)          | 22 (0.0144)          | 43 (0.0281)          | 58 (0.038)    | 0.7665        | 0.0034 |
|                                  | HP                | 409 (0.2677)                  | 685 (0.4483)        | 783 (0.5124)        | 842 (0.551)          | 0.9874        | 0.1987        | 1026 (0.6715)         | <b>1313 (0.8593)</b> | <b>1373 (0.8986)</b> | <b>1391 (0.9103)</b> | 0.994         | 0.6304        |        |
|                                  |                   | 345 (0.2258)                  | 684 (0.4476)        | 836 (0.5471)        | 887 (0.5805)         | 0.985         | 0.1713        | 793 (0.519)           | 1093 (0.7153)        | 1201 (0.786)         | 1256 (0.822)         | 0.9926        | 0.4475        |        |
|                                  | MP                | 222 (0.1453)                  | 470 (0.3076)        | 618 (0.4045)        | 677 (0.4431)         | 0.9508        | 0.0992        | 665 (0.4352)          | 965 (0.6315)         | 1068 (0.699)         | 1116 (0.7304)        | 0.9785        | 0.3582        |        |
|                                  |                   | 17 (0.0111)                   | 60 (0.0393)         | 145 (0.0949)        | 205 (0.1342)         | 0.8764        | 0.0066        | 16 (0.0105)           | 145 (0.0949)         | 192 (0.1257)         | 220 (0.144)          | 0.8431        | 0.0071        |        |
|                                  | UBERON            | 158 (0.1034)                  | 379 (0.248)         | 474 (0.3102)        | 525 (0.3436)         | 0.8866        | 0.0673        | 577 (0.3776)          | 800 (0.5236)         | 888 (0.5812)         | 937 (0.6132)         | 0.9291        | 0.2937        |        |
|                                  |                   | 33 (0.0216)                   | 122 (0.0798)        | 221 (0.1446)        | 313 (0.2048)         | 0.7777        | 0.0131        | 44 (0.0288)           | 143 (0.0936)         | 295 (0.1931)         | 368 (0.2408)         | 0.7762        | 0.0176        |        |
|                                  | Union             | 375 (0.2454)                  | 650 (0.4254)        | 787 (0.5151)        | 835 (0.5465)         | 0.9563        | 0.1774        | 959 (0.6276)          | 1253 (0.82)          | 1325 (0.8671)        | 1368 (0.8953)        | 0.9939        | 0.5775        |        |
|                                  |                   | 258 (0.1688)                  | 519 (0.3397)        | 645 (0.4221)        | 710 (0.4647)         | 0.9603        | 0.1158        | 427 (0.2795)          | 762 (0.4987)         | 934 (0.6113)         | 1001 (0.6551)        | 0.9856        | 0.2151        |        |

Table 10: Evaluation results for the ablation study (shaded rows) considering only the annotations without using gene-disease associations and additional taxonomies from uPheno ontology.

Table 8. Based on these results, our method, EmbedPVP, outperformed the other methods that mainly rely on existing knowledge for gene-to-disease phenotype annotations.

## References

- [1] F. Zhang and J. R. Lupski, “Non-coding genetic variants in human disease,” *Human molecular genetics*, vol. 24, no. R1, pp. R102–R110, 2015.
